# Supplementary material for: Design, synthesis and apoptotic effects of novel benzoxazole compounds
Source: publisher site journal article supplement (doi:10.1515/znc-2023-0099), 2023-10-31
Supplement: Supplementary file 1 [file j_znc-2023-0099_suppl_001.pdf]

## **Supporting Information**

Data File: C:\LabSolutions\Data\Analz\data\SO-1\_52.lcd

| Elmt | Val. | Min | Max | Use Adduct |
|------|------|-----|-----|------|------|-----|-----|------|------|-----|-----|------|------|-----|-----|------------|
| H    | 1    | 8   | 20  | O    | 2    | 1   | 6   | Cl   | 1    | 0   | 2   | I    | 3    | 0   | 0   | H          |
| C    | 4    | 12  | 25  | F    | 1    | 0   | 0   | Br   | 1    | 0   | 1   |      |      |     |     |            |
| N    | 3    | 3   | 6   | S    | 2    | 1   | 3   | Ru   | 2    | 0   | 0   |      |      |     |     |            |

Error Margin (ppm): 10  
 HC Ratio: unlimited  
 Max Isotopes: 3  
 MSn Iso RI (%): 10.00

DBE Range: 0.0 - 15.0  
 Apply N Rule: yes  
 Isotope RI (%): 1.00  
 MSn Logic Mode: AND

Electron Ions: both  
 Use MSn Info: no  
 Isotope Res: 10000  
 Max Results: 500

Event#: 1 MS(E+) Ret. Time : 5.867 Scan#: 881

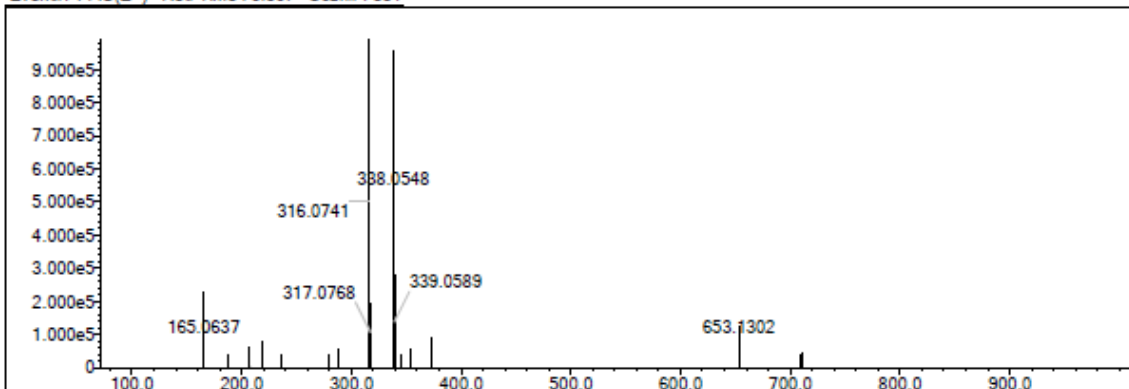

Measured region for 316.0741 m/z

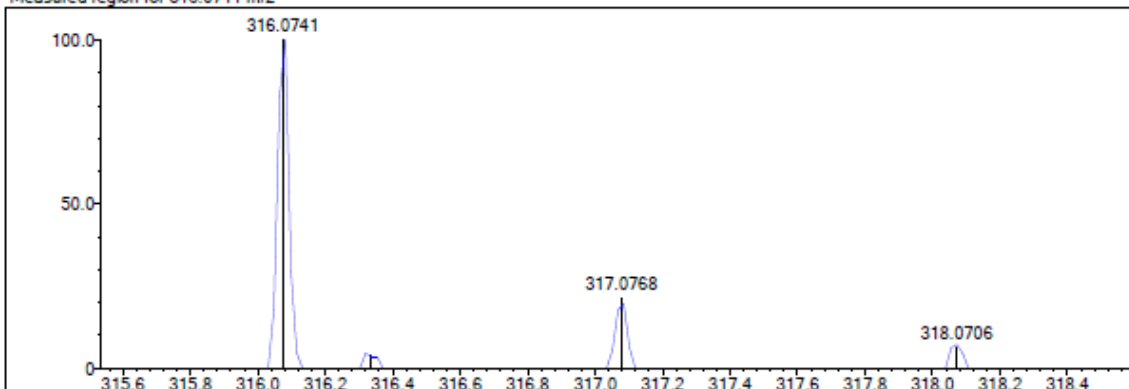

C15 H13 N3 O3 S [M+H]<sup>+</sup> : Predicted region for 316.0750 m/z

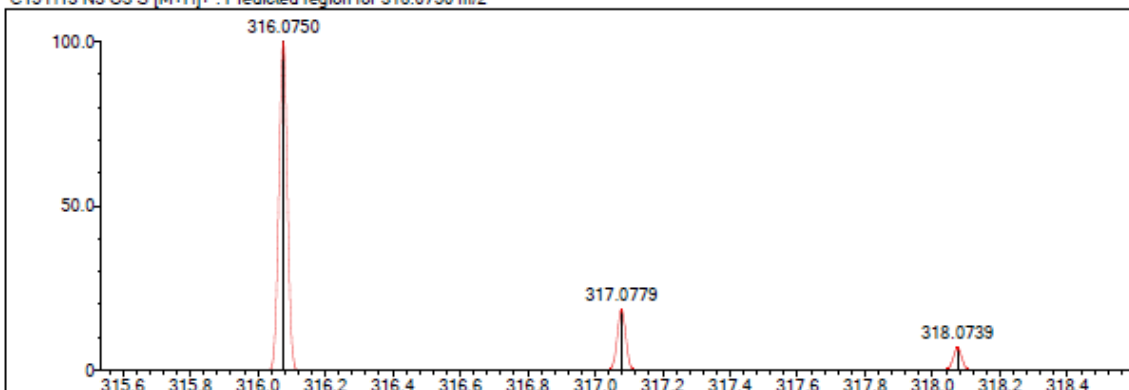

| Rank | Score | Formula (M)     | Ion                | Meas. m/z | Pred. m/z | Df. (mDa) | Df. (ppm) | Iso   | DBE  |
|------|-------|-----------------|--------------------|-----------|-----------|-----------|-----------|-------|------|
| 1    | 76.70 | C15 H13 N3 O3 S | [M+H] <sup>+</sup> | 316.0741  | 316.0750  | -0.9      | -2.85     | 80.42 | 11.0 |

Figure 1. Compound 3a Mass spectrum

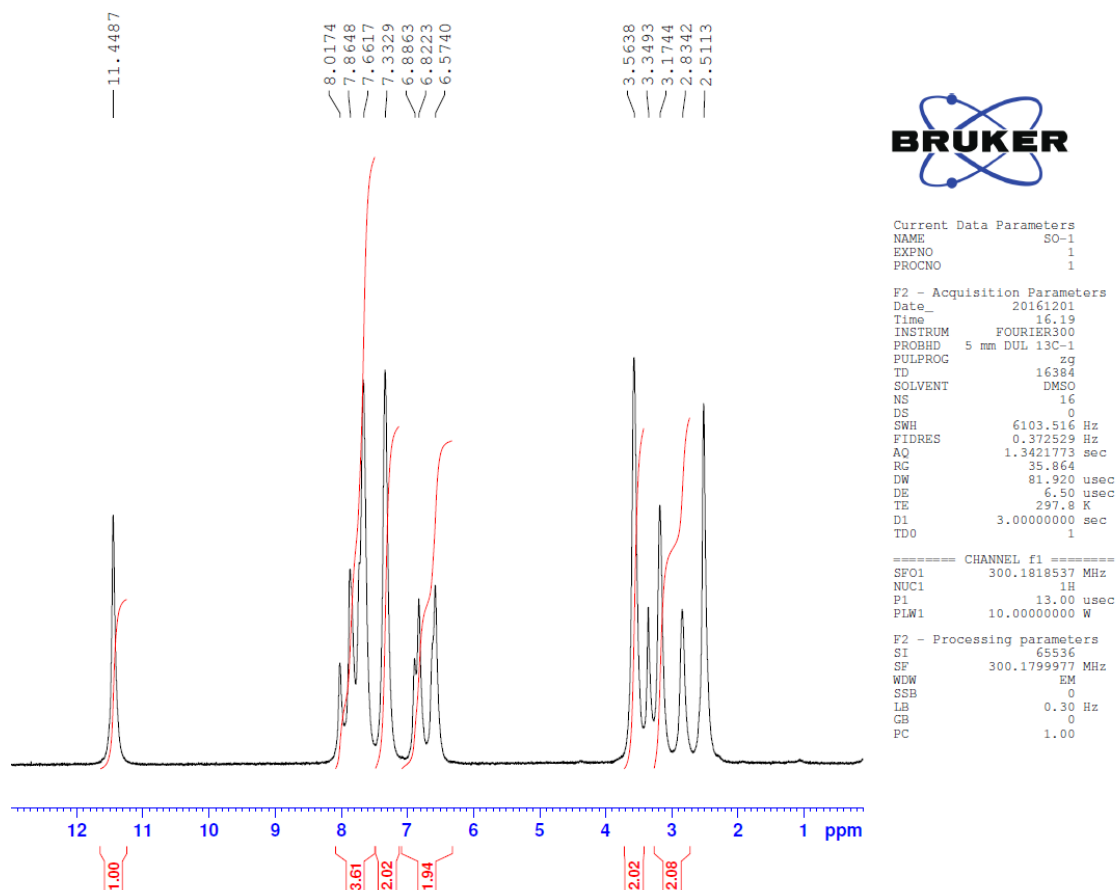

**Figure 2.** Compound 3a  $^1\text{H}$  NMR spectrum

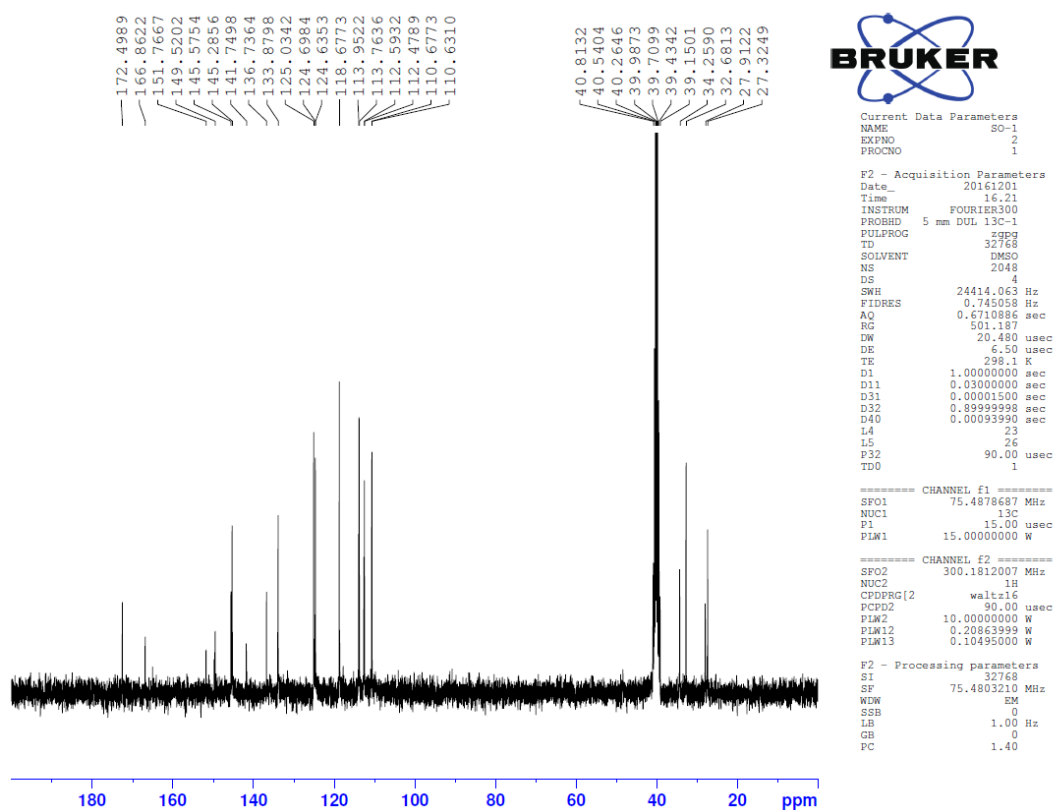

**Figure 3.** Compound 3a  $^{13}\text{C}$  NMR spectrum

Data File: C:\LabSolutions\Data\Analz\lderya\SO-2\_53.lcd

| Elmt | Val. | Min | Max | Use Adduct |
|------|------|-----|-----|------|------|-----|-----|------|------|-----|-----|------|------|-----|-----|------------|
| H    | 1    | 8   | 20  | O    | 2    | 1   | 6   | Cl   | 1    | 0   | 0   | I    | 3    | 0   | 0   | H          |
| C    | 4    | 12  | 25  | F    | 1    | 0   | 0   | Br   | 1    | 0   | 1   |      |      |     |     |            |
| N    | 3    | 3   | 6   | S    | 2    | 1   | 3   | Ru   | 2    | 0   | 0   |      |      |     |     |            |

Error Margin (ppm): 10

HC Ratio: unlimited

Max Isotopes: 3

MSn Iso RI (%): 10.00

DBE Range: 0.0 - 15.0

Apply N Rule: yes

Isotope RI (%): 1.00

MSn Logic Mode: AND

Electron Ions: both

Use MSn Info: no

Isotope Res: 10000

Max Results: 500

Event#: 1 MS(E+) Ret. Time : 6.707 Scan#: 1007

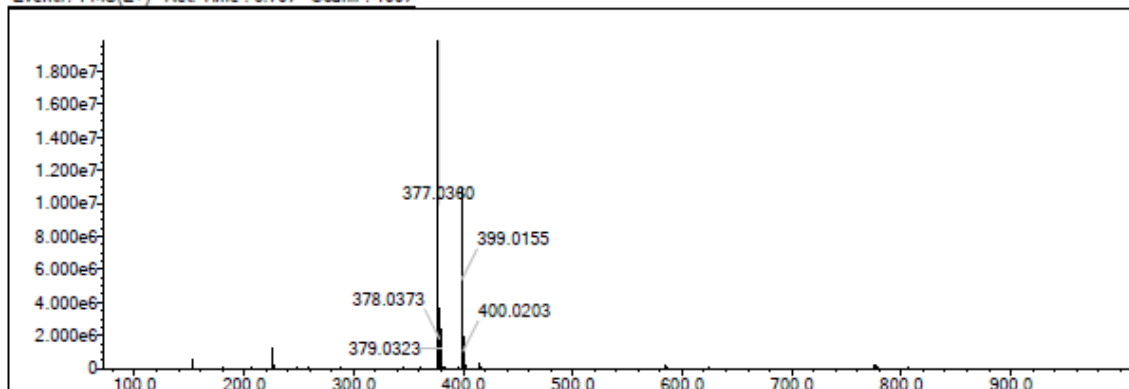

Measured region for 377.0360 m/z

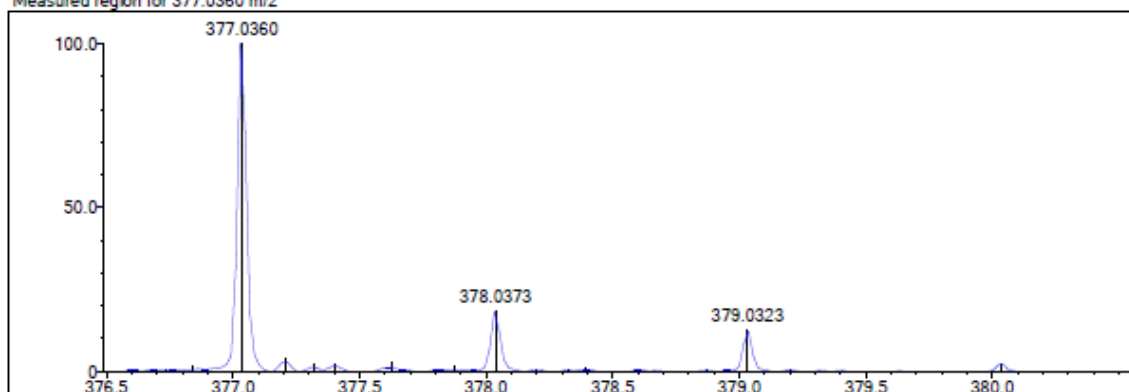

C15 H12 N4 O4 S2 [M+H]<sup>+</sup> : Predicted region for 377.0373 m/z

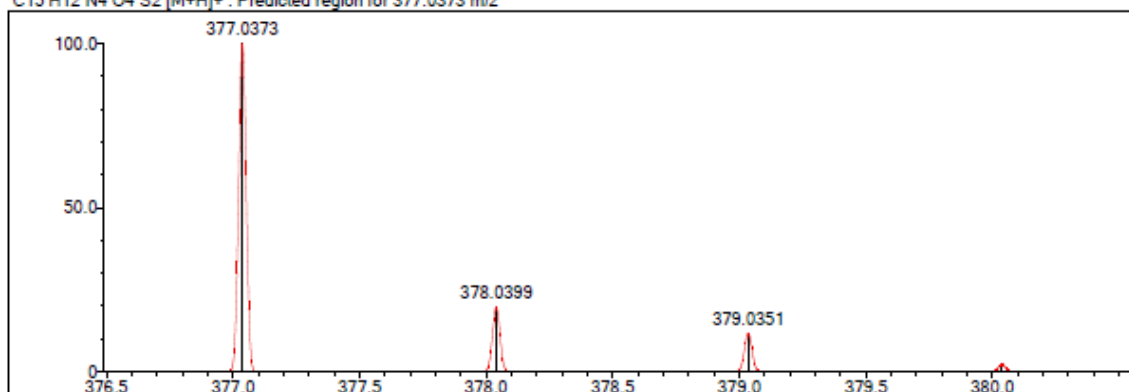

| Rank | Score | Formula (M)      | Ion                | Meas. m/z | Pred. m/z | Df. (mDa) | Df. (ppm) | Iso   | DBE  |
|------|-------|------------------|--------------------|-----------|-----------|-----------|-----------|-------|------|
| 1    | 71.04 | C15 H12 N4 O4 S2 | [M+H] <sup>+</sup> | 377.0360  | 377.0373  | -1.3      | -3.45     | 75.68 | 12.0 |

Figure 4. Compound 3b Mass spectrum

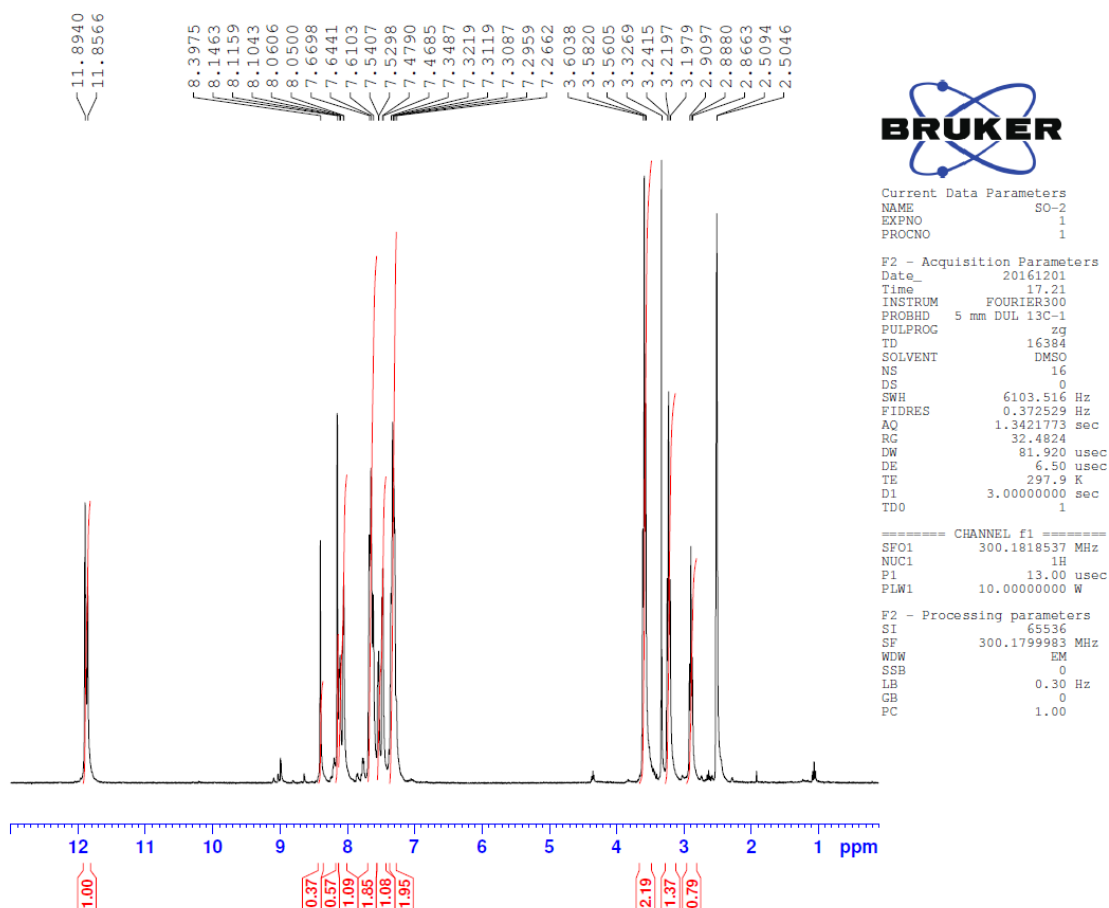

Figure 5. Compound 3b  $^1\text{H}$  NMR spectrum

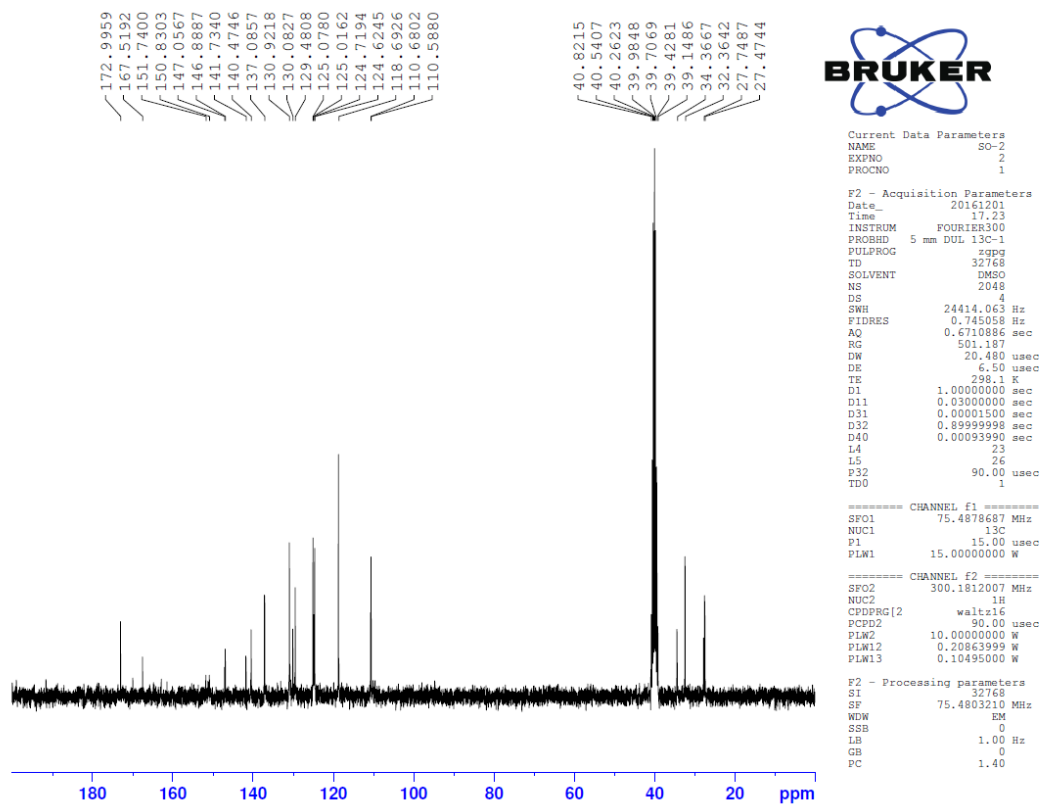

Figure 6. Compound 3b  $^{13}\text{C}$  NMR spectrum

Data File: C:\LabSolutions\Data\Analiz\deriv\SO-3\_54.lod

| Elmt | Val. | Min | Max | Use Adduct |
|------|------|-----|-----|------|------|-----|-----|------|------|-----|-----|------|------|-----|-----|------------|
| H    | 1    | 8   | 20  | O    | 2    | 1   | 6   | Cl   | 1    | 0   | 0   | I    | 3    | 0   | 0   | H          |
| C    | 4    | 15  | 25  | F    | 1    | 0   | 0   | Br   | 1    | 0   | 1   |      |      |     |     |            |
| N    | 3    | 3   | 6   | S    | 2    | 1   | 3   | Ru   | 2    | 0   | 0   |      |      |     |     |            |

Error Margin (ppm): 10

HC Ratio: unlimited

Max Isotopes: 3

MSn Iso RI (%): 10.00

DBE Range: 0.0 - 15.0

Apply N Rule: yes

Isotope RI (%): 1.00

MSn Logic Mode: AND

Electron Ions: both

Use MSn Info: no

Isotope Res: 10000

Max Results: 500

Event#: 1 MS(E+) Ret. Time : 7.053 Scan#: 1059

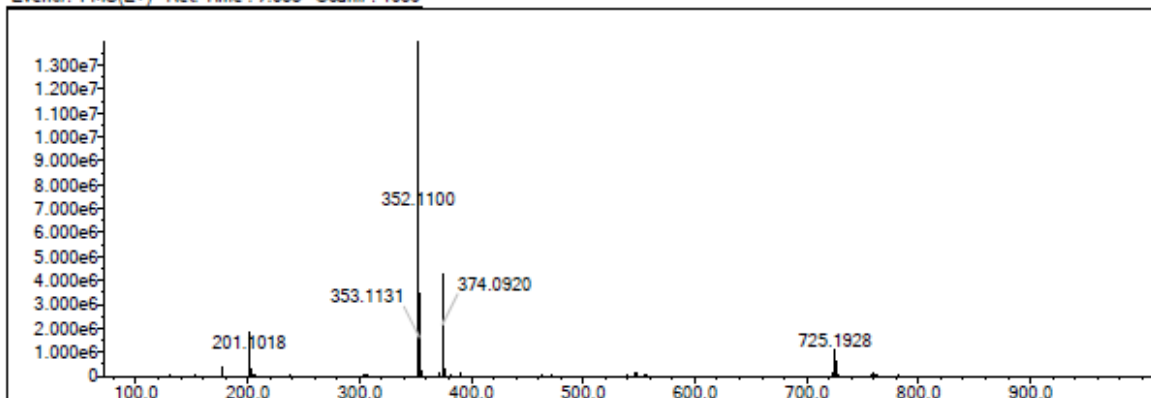

Measured region for 352.1100 m/z

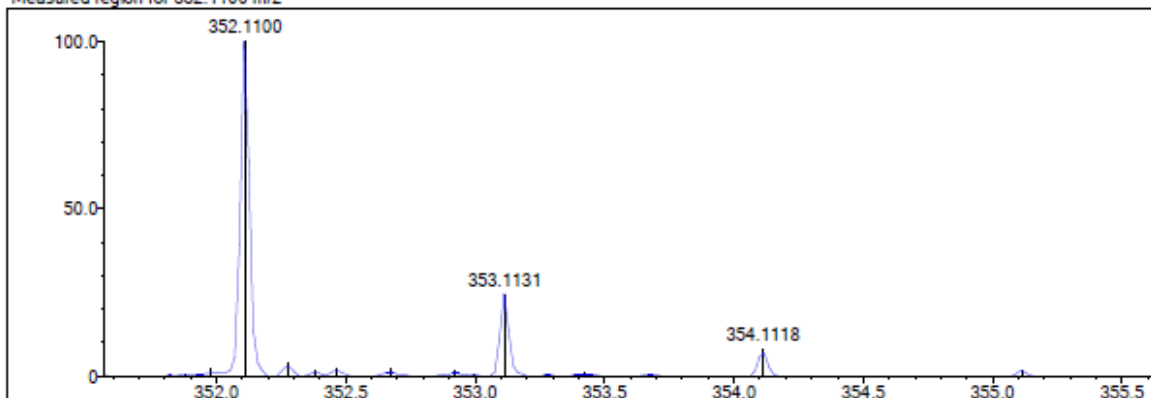

C19 H17 N3 O2 S [M+H]<sup>+</sup> : Predicted region for 352.1114 m/z

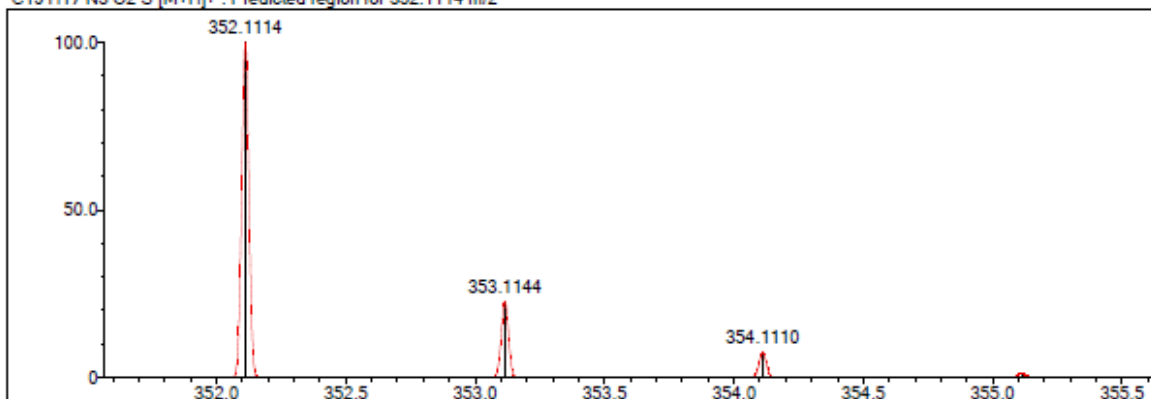

| Rank | Score | Formula (M)     | Ion                | Meas. m/z | Pred. m/z | Df. (mDa) | Df. (ppm) | Iso   | DBE  |
|------|-------|-----------------|--------------------|-----------|-----------|-----------|-----------|-------|------|
| 1    | 74.45 | C19 H17 N3 O2 S | [M+H] <sup>+</sup> | 352.1100  | 352.1114  | -1.4      | -3.98     | 80.44 | 13.0 |

Figure 7. Compound 3c Mass spectrum

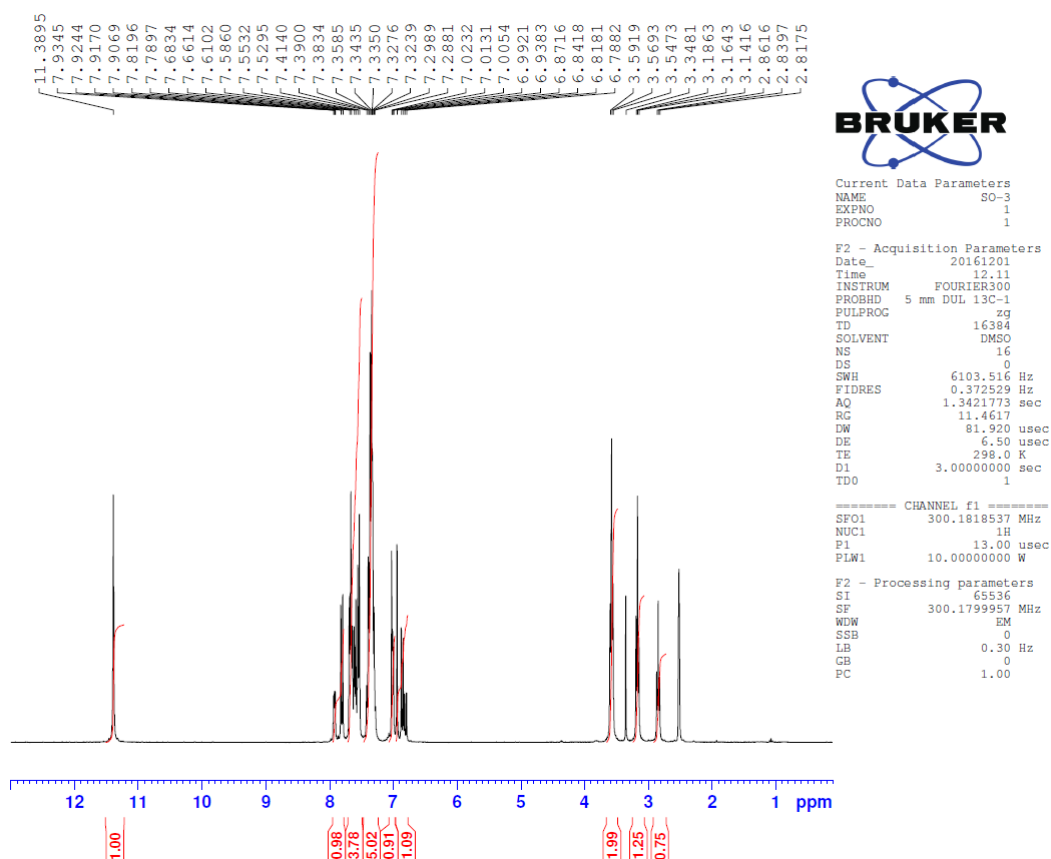

**Figure 8.** Compound 3c  $^1\text{H}$  NMR spectrum

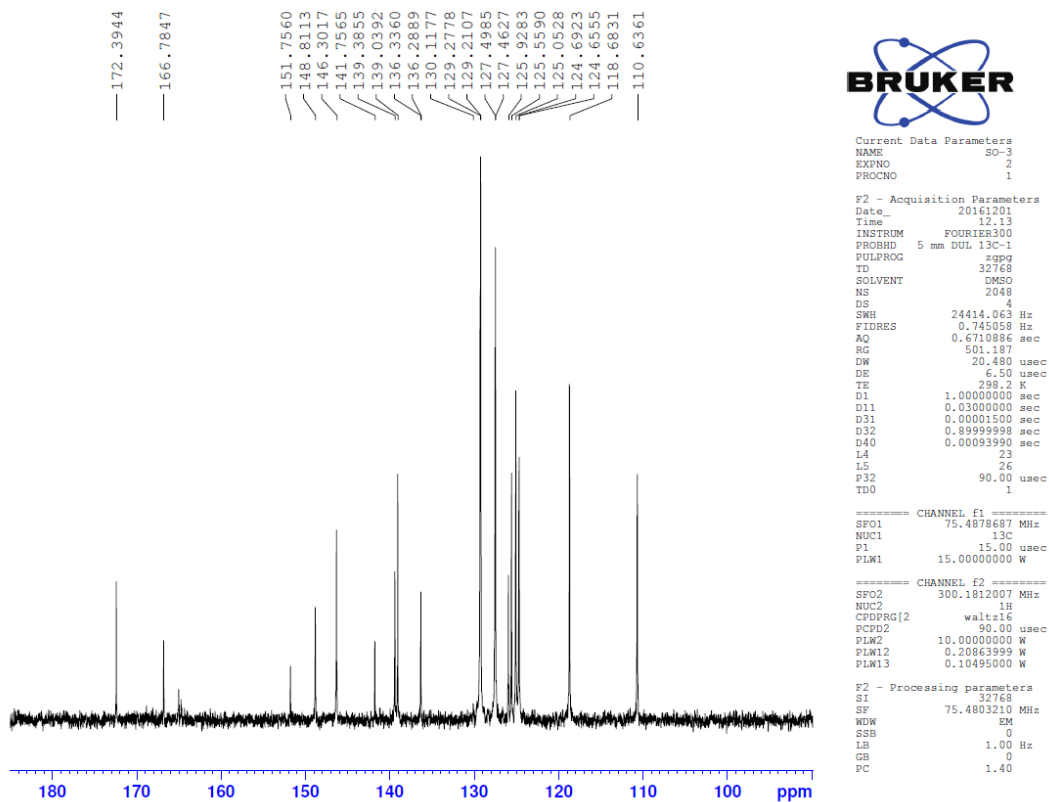

**Figure 9.** Compound 3c  $^{13}\text{C}$  NMR spectrum

Data File: C:\LabSolutions\Data\Analz\Idea\SO-4\_55.lod

| Elmt | Val. | Min | Max | Use Adduct |
|------|------|-----|-----|------|------|-----|-----|------|------|-----|-----|------|------|-----|-----|------------|
| H    | 1    | 8   | 20  | O    | 2    | 1   | 6   | Cl   | 1    | 0   | 0   | I    | 3    | 0   | 0   | H          |
| C    | 4    | 15  | 25  | F    | 1    | 0   | 0   | Br   | 1    | 0   | 1   |      |      |     |     |            |
| N    | 3    | 3   | 6   | S    | 2    | 1   | 3   | Ru   | 2    | 0   | 0   |      |      |     |     |            |

Error Margin (ppm): 10  
 HC Ratio: unlimited  
 Max Isotopes: 3  
 MSn Iso RI (%): 10.00

DBE Range: 0.0 - 15.0  
 Apply N Rule: yes  
 Isotope RI (%): 1.00  
 MSn Logic Mode: AND

Electron Ions: both  
 Use MSn Info: no  
 Isotope Res: 10000  
 Max Results: 500

Event#: 1 MS(E+) Ret. Time : 4.667 Scan#: 701

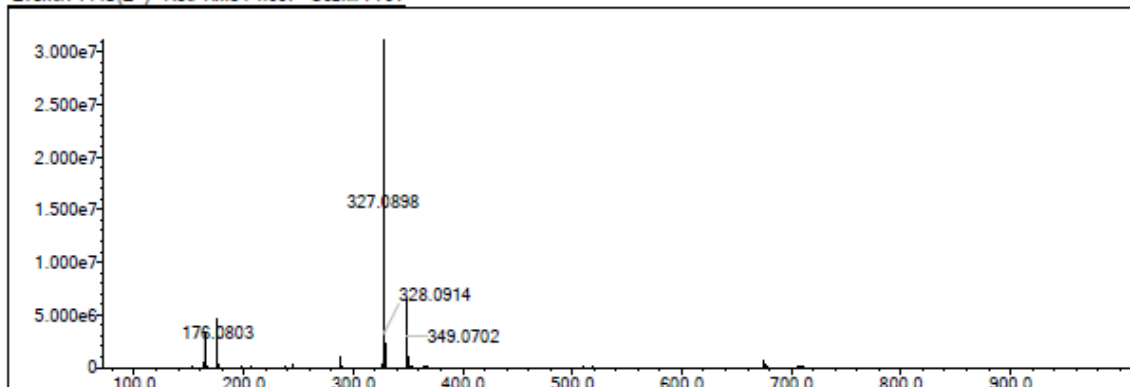

Measured region for 327.0898 m/z

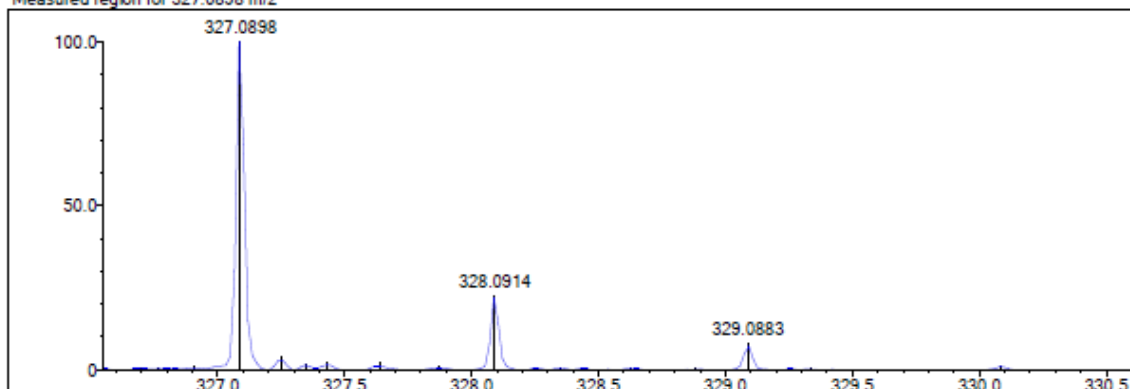

C16 H14 N4 O2 S [M+H]<sup>+</sup> : Predicted region for 327.0910 m/z

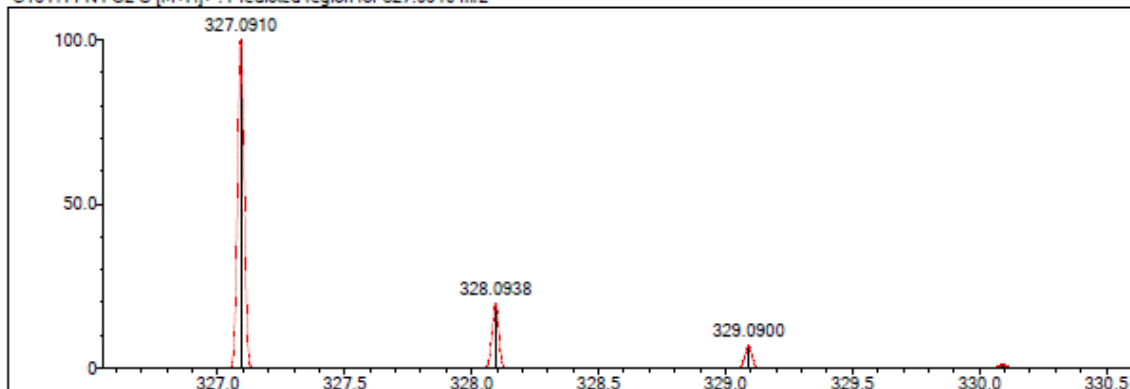

| Rank | Score | Formula (M)     | Ion                | Meas. m/z | Pred. m/z | Df. (mDa) | Df. (ppm) | Iso   | DBE  |
|------|-------|-----------------|--------------------|-----------|-----------|-----------|-----------|-------|------|
| 1    | 51.74 | C16 H14 N4 O2 S | [M+H] <sup>+</sup> | 327.0898  | 327.0910  | -1.2      | -3.67     | 55.45 | 12.0 |

Figure 10. Compound 3d Mass spectrum



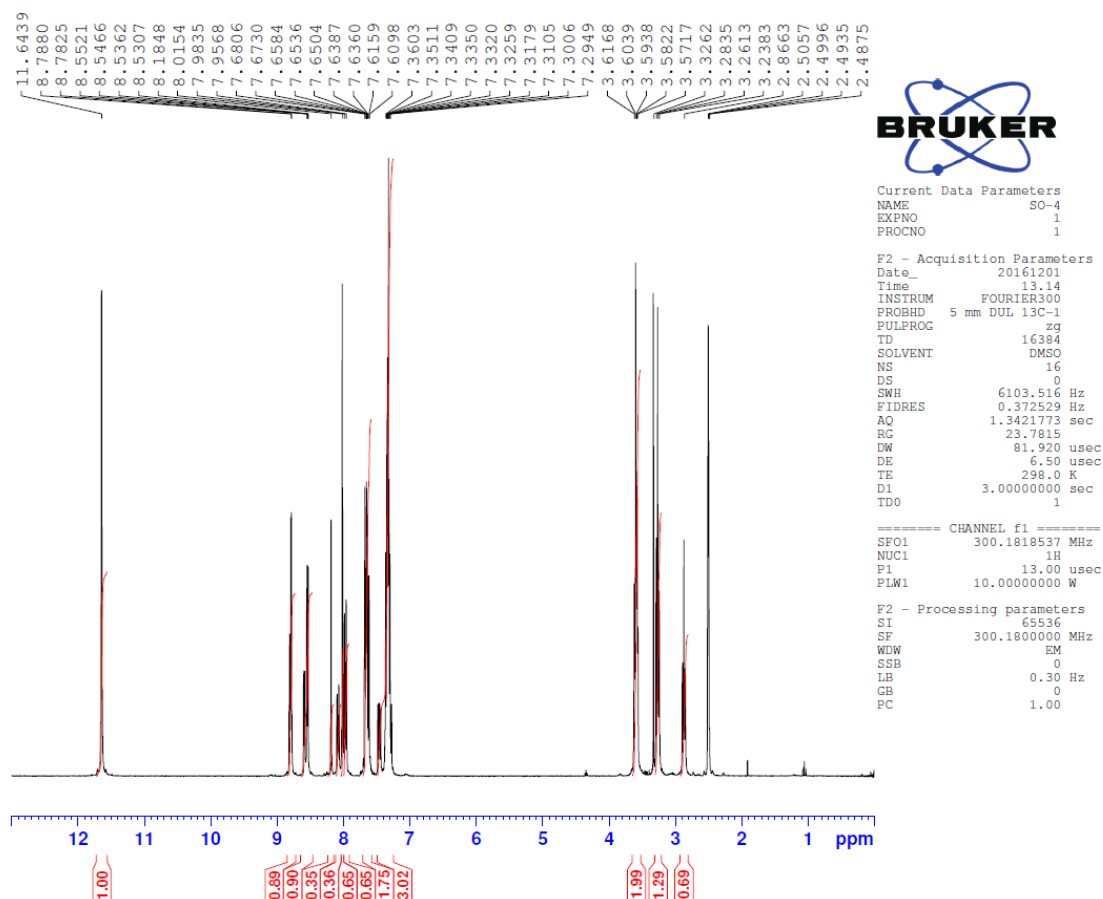

Figure 11. Compound 3d  $^1\text{H}$  NMR spectrum

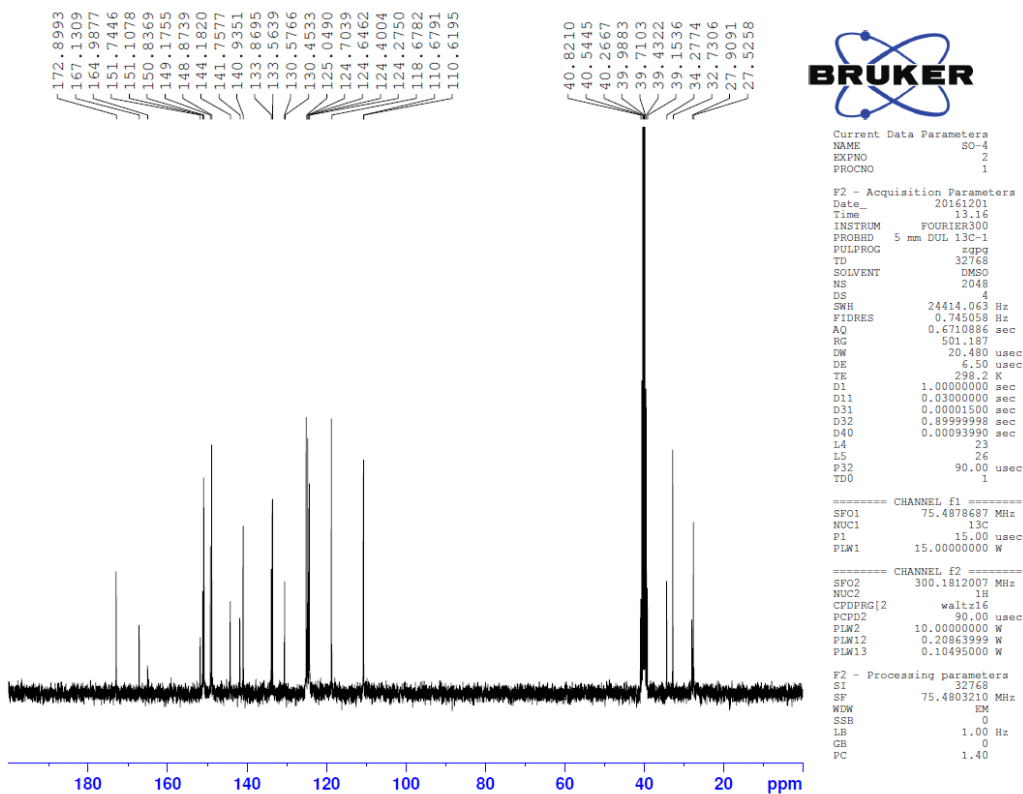

Figure 12. Compound 3d  $^{13}\text{C}$  NMR spectrum

Data File: C:\LabSolutions\Data\Analz\Idea\ISO-5\_56.lod

| Elmt | Val. | Min | Max | Use Adduct |
|------|------|-----|-----|------|------|-----|-----|------|------|-----|-----|------|------|-----|-----|------------|
| H    | 1    | 8   | 20  | O    | 2    | 1   | 6   | Cl   | 1    | 0   | 0   | I    | 3    | 0   | 0   | H          |
| C    | 4    | 15  | 25  | F    | 1    | 0   | 0   | Br   | 1    | 0   | 1   |      |      |     |     |            |
| N    | 3    | 3   | 6   | S    | 2    | 1   | 3   | Ru   | 2    | 0   | 0   |      |      |     |     |            |

Error Margin (ppm): 10

HC Ratio: unlimited

Max Isotopes: 3

MSn Iso RI (%): 10.00

DBE Range: 0.0 - 15.0

Apply N Rule: yes

Isotope RI (%): 1.00

MSn Logic Mode: AND

Electron Ions: both

Use MSn Info: no

Isotope Res: 10000

Max Results: 500

Event#: 1 MS(E+) Ret. Time : 6.427 Scan#: 965

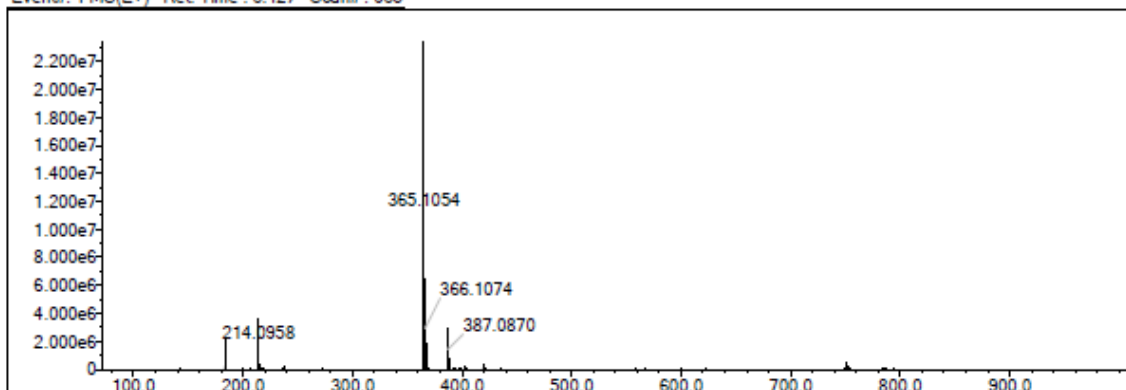

Measured region for 365.1054 m/z

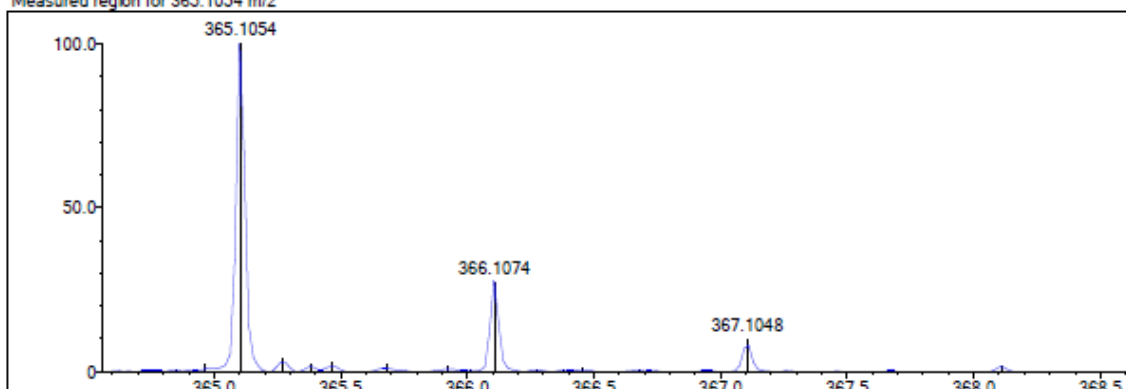

C19 H16 N4 O2 S [M+H]<sup>+</sup> : Predicted region for 365.1067 m/z

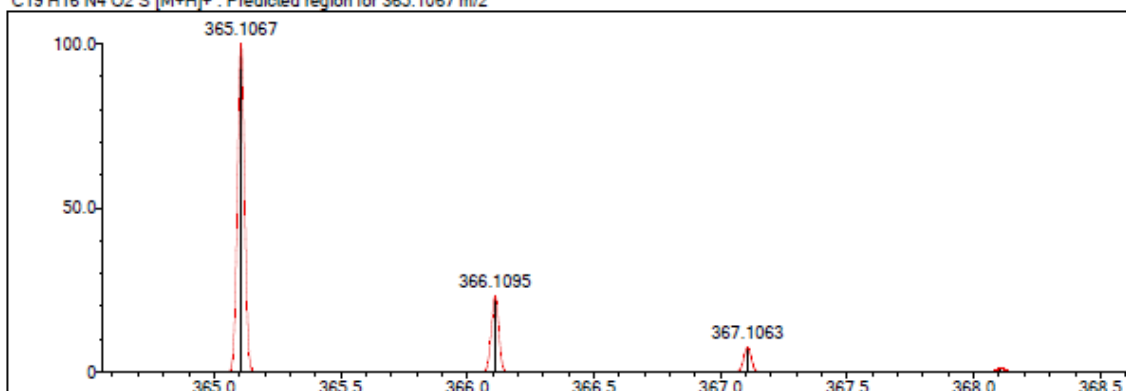

| Rank | Score | Formula (M)     | Ion                | Meas. m/z | Pred. m/z | Df. (mDa) | Df. (ppm) | Iso   | DBE  |
|------|-------|-----------------|--------------------|-----------|-----------|-----------|-----------|-------|------|
| 1    | 70.96 | C19 H16 N4 O2 S | [M+H] <sup>+</sup> | 365.1054  | 365.1067  | -1.3      | -3.56     | 75.81 | 14.0 |

Figure 13. Compound 3e Mass spectrum

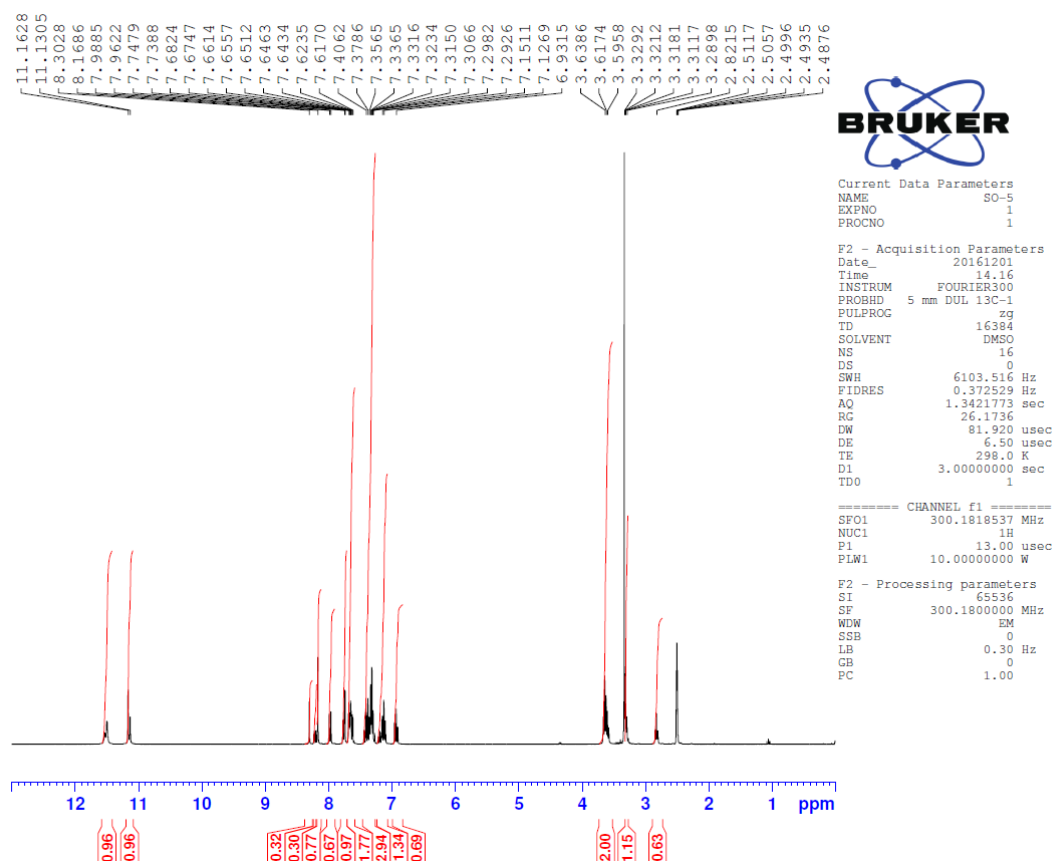

**Figure 14.** Compound 3e  $^1\text{H}$  NMR spectrum

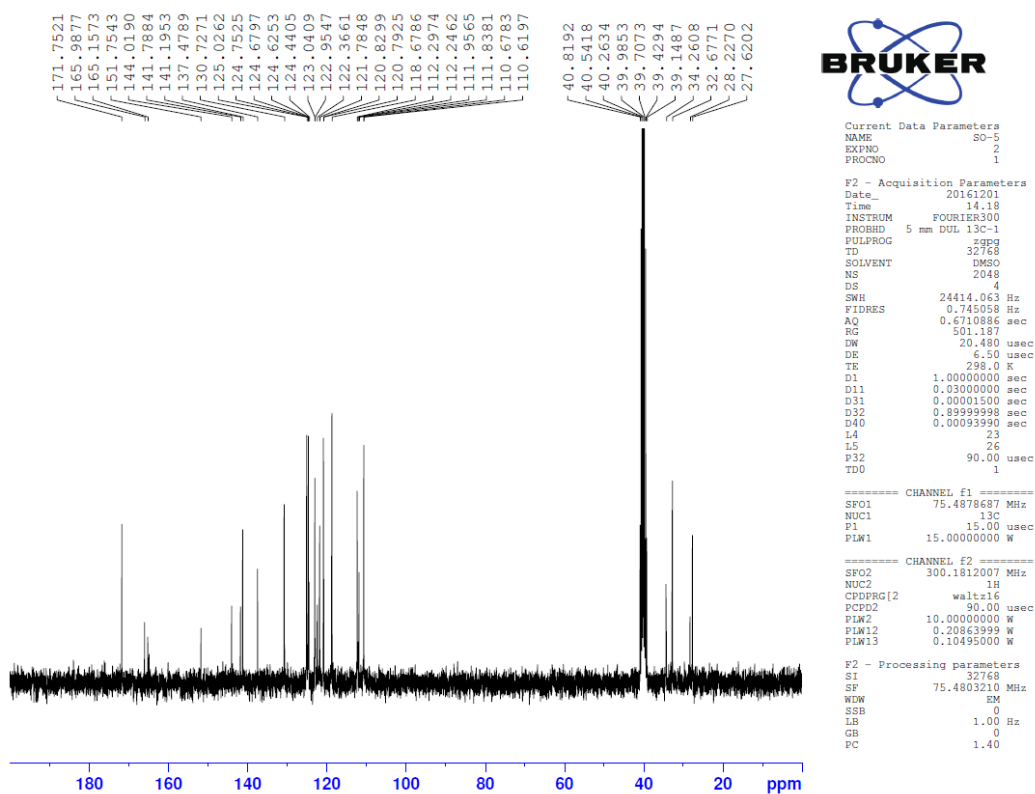

**Figure 15.** Compound 3e  $^{13}\text{C}$  NMR spectrum

Data File: C:\LabSolutions\Data\Analiz\derya\NO-1\_46.lod

| Elmt | Val. | Min | Max | Use Adduct |
|------|------|-----|-----|------|------|-----|-----|------|------|-----|-----|------|------|-----|-----|------------|
| H    | 1    | 9   | 20  | O    | 2    | 1   | 6   | Cl   | 1    | 0   | 2   | I    | 3    | 0   | 0   | H          |
| C    | 4    | 18  | 25  | F    | 1    | 0   | 1   | Br   | 1    | 0   | 1   |      |      |     |     |            |
| N    | 3    | 3   | 6   | S    | 2    | 2   | 2   | Ru   | 2    | 0   | 0   |      |      |     |     |            |

Error Margin (ppm): 5

HC Ratio: unlimited

Max Isotopes: 3

MSn Iso RI (%): 10.00

DBE Range: 12.0 - 15.0

Apply N Rule: yes

Isotope RI (%): 1.00

MSn Logic Mode: AND

Electron Ions: both

Use MSn Info: no

Isotope Res: 10000

Max Results: 500

Event#: 1 MS(E+) Ret. Time : 7.253 Scan#: 1089

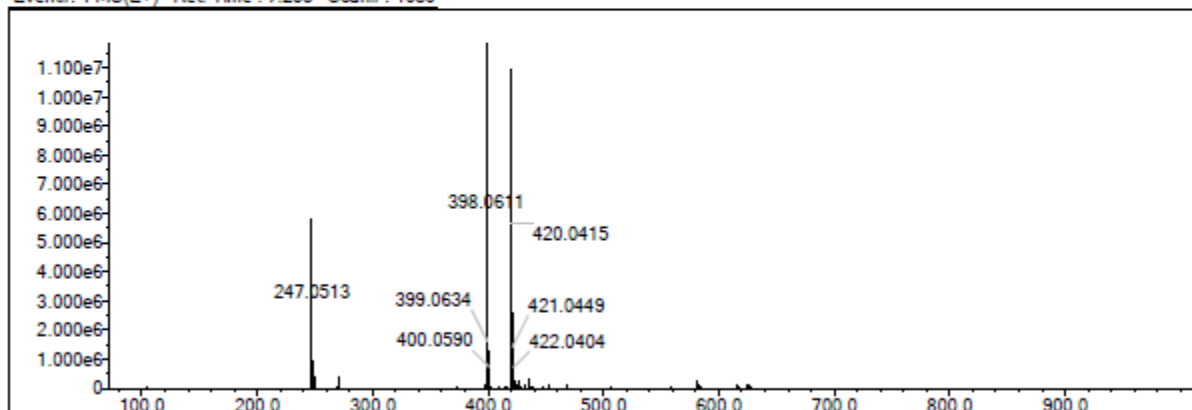

Measured region for 398.0611 m/z

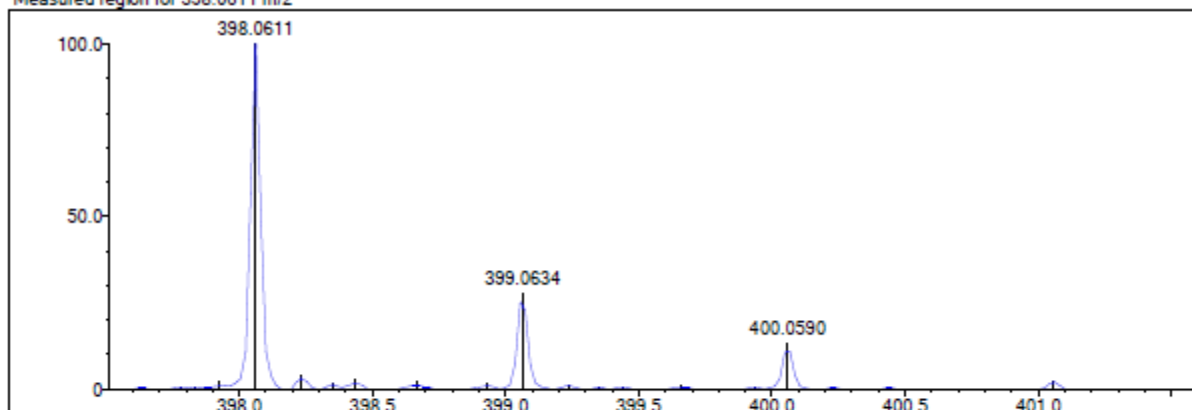

C19 H15 N3 O3 S2 [M+H]<sup>+</sup>: Predicted region for 398.0628 m/z

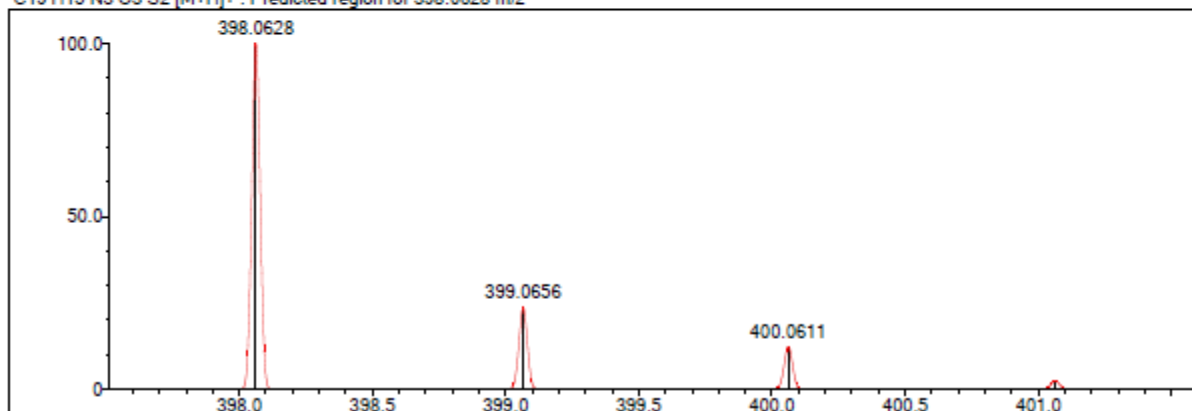

| Rank | Score | Formula (M)      | Ion                | Meas. m/z | Pred. m/z | Df. (mDa) | Df. (ppm) | Iso   | DBE  |
|------|-------|------------------|--------------------|-----------|-----------|-----------|-----------|-------|------|
| 1    | 86.48 | C19 H15 N3 O3 S2 | [M+H] <sup>+</sup> | 398.0611  | 398.0628  | -1.7      | -4.27     | 94.18 | 14.0 |

Figure 16. Compound 5a Mass spectrum

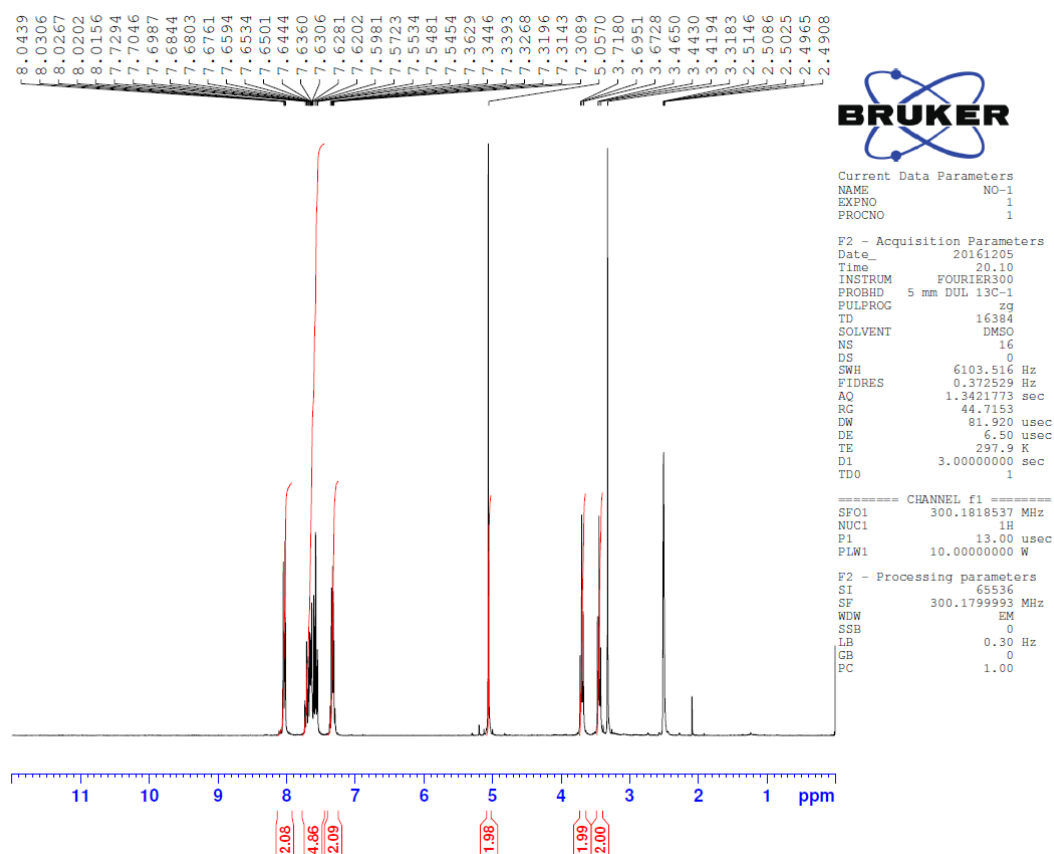

Figure 17. Compound 5a  $^1\text{H}$  NMR spectrum

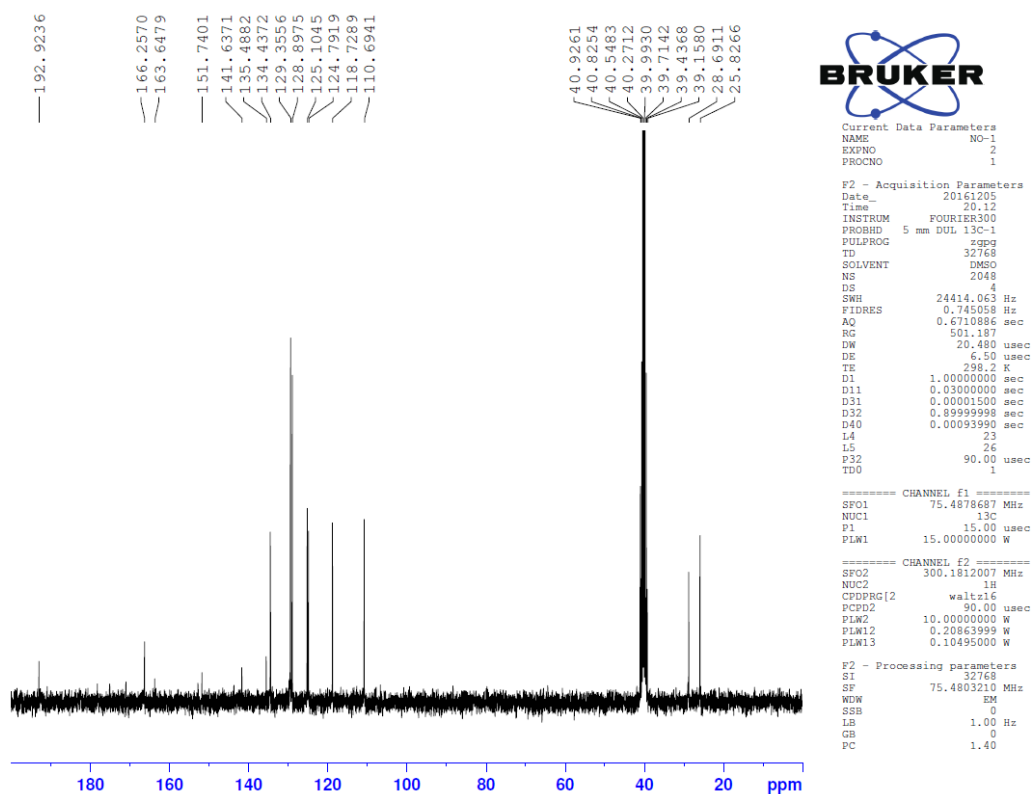

Figure 18. Compound 5a  $^{13}\text{C}$  NMR spectrum

Data File: C:\LabSolutions\Data\Analiz\data\NO-2\_47.lcd

| Elmt | Val. | Min | Max | Use Adduct |
|------|------|-----|-----|------|------|-----|-----|------|------|-----|-----|------|------|-----|-----|------------|
| H    | 1    | 9   | 20  | O    | 2    | 1   | 6   | Cl   | 1    | 0   | 2   | I    | 3    | 0   | 0   | H          |
| C    | 4    | 18  | 25  | F    | 1    | 0   | 1   | Br   | 1    | 0   | 1   |      |      |     |     |            |
| N    | 3    | 3   | 6   | S    | 2    | 2   | 2   | Ru   | 2    | 0   | 0   |      |      |     |     |            |

Error Margin (ppm): 5  
 HC Ratio: unlimited  
 Max Isotopes: 3  
 MSn Iso RI (%): 10.00

DBE Range: 12.0 - 15.0  
 Apply N Rule: yes  
 Isotope RI (%): 1.00  
 MSn Logic Mode: AND

Electron Ions: both  
 Use MSn Info: no  
 Isotope Res: 10000  
 Max Results: 500

Event#: 1 MS(E+) Ret. Time : 7.507 Scan#: 1127

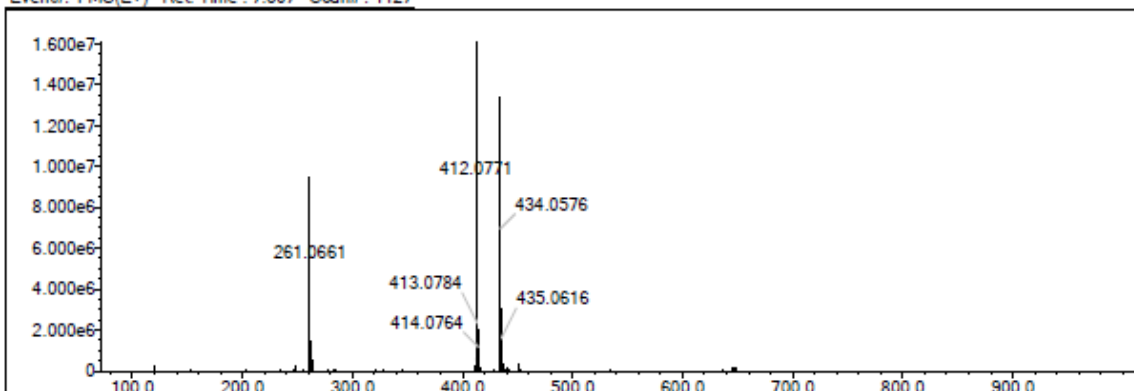

Measured region for 412.0771 m/z

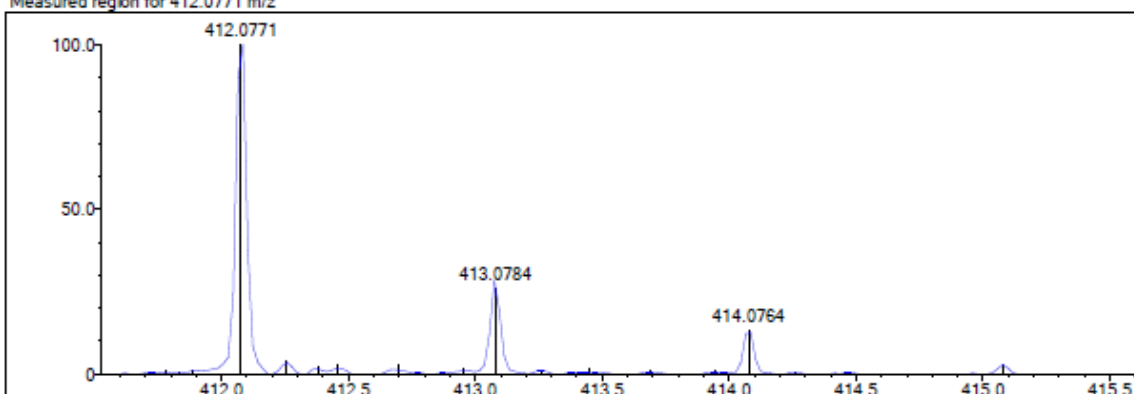

C20 H17 N3 O3 S2 [M+H]<sup>+</sup> : Predicted region for 412.0784 m/z

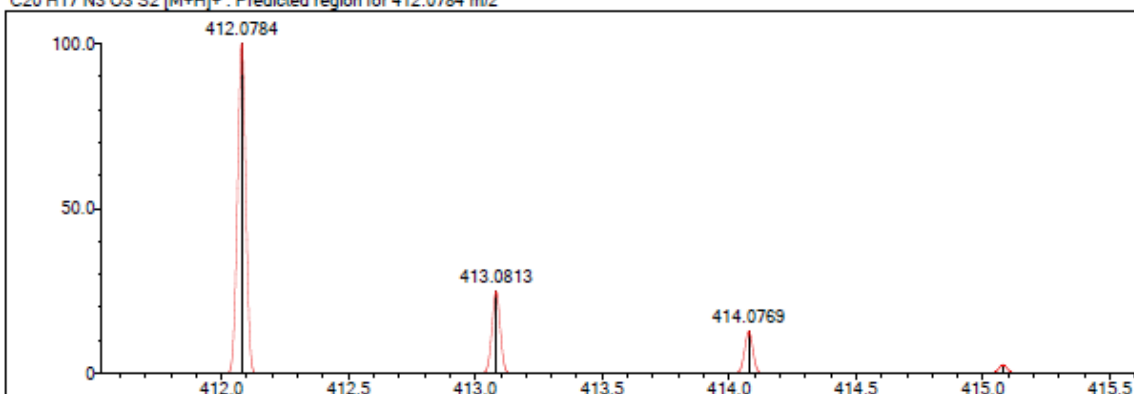

| Rank | Score | Formula (M)      | Ion                | Meas. m/z | Pred. m/z | Df. (mDa) | Df. (ppm) | Iso    | DBE  |
|------|-------|------------------|--------------------|-----------|-----------|-----------|-----------|--------|------|
| 1    | 94.63 | C20 H17 N3 O3 S2 | [M+H] <sup>+</sup> | 412.0771  | 412.0784  | -1.3      | -3.15     | 100.00 | 14.0 |

Figure 19. Compound 5b Mass spectrum

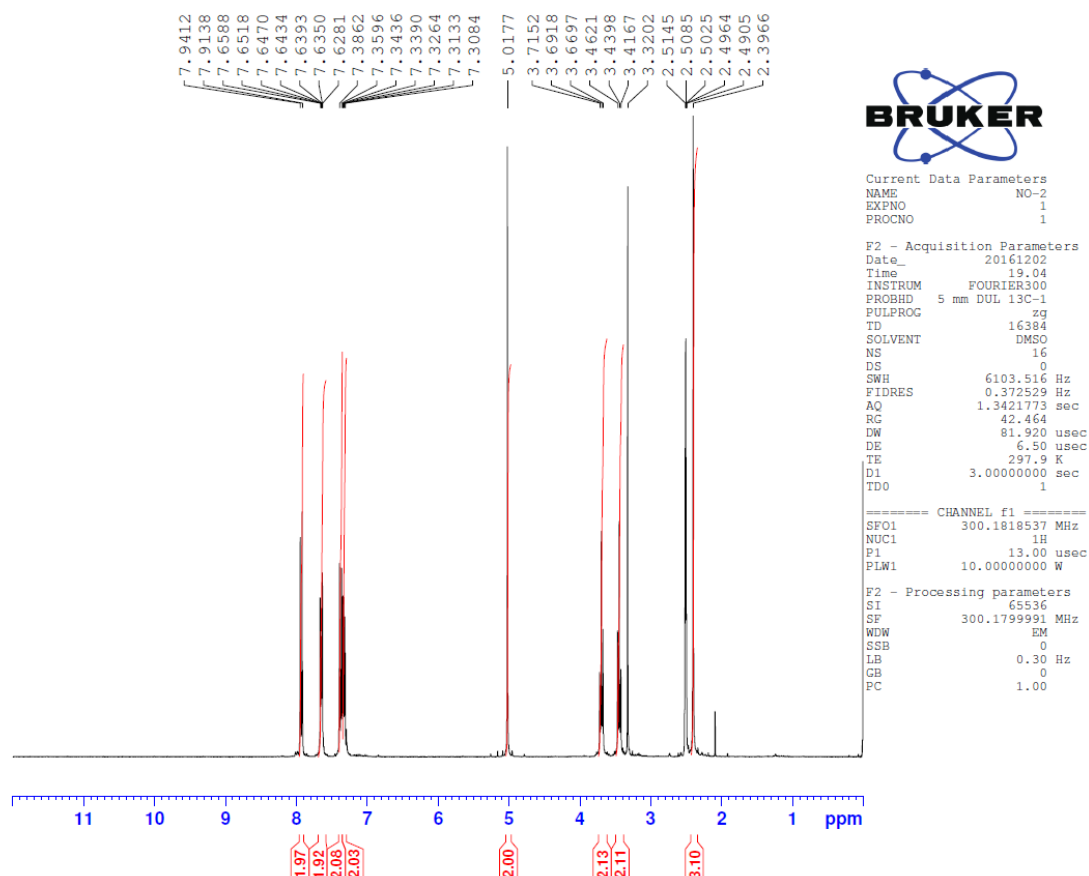

**Figure 20.** Compound 5b  $^1\text{H}$  NMR spectrum

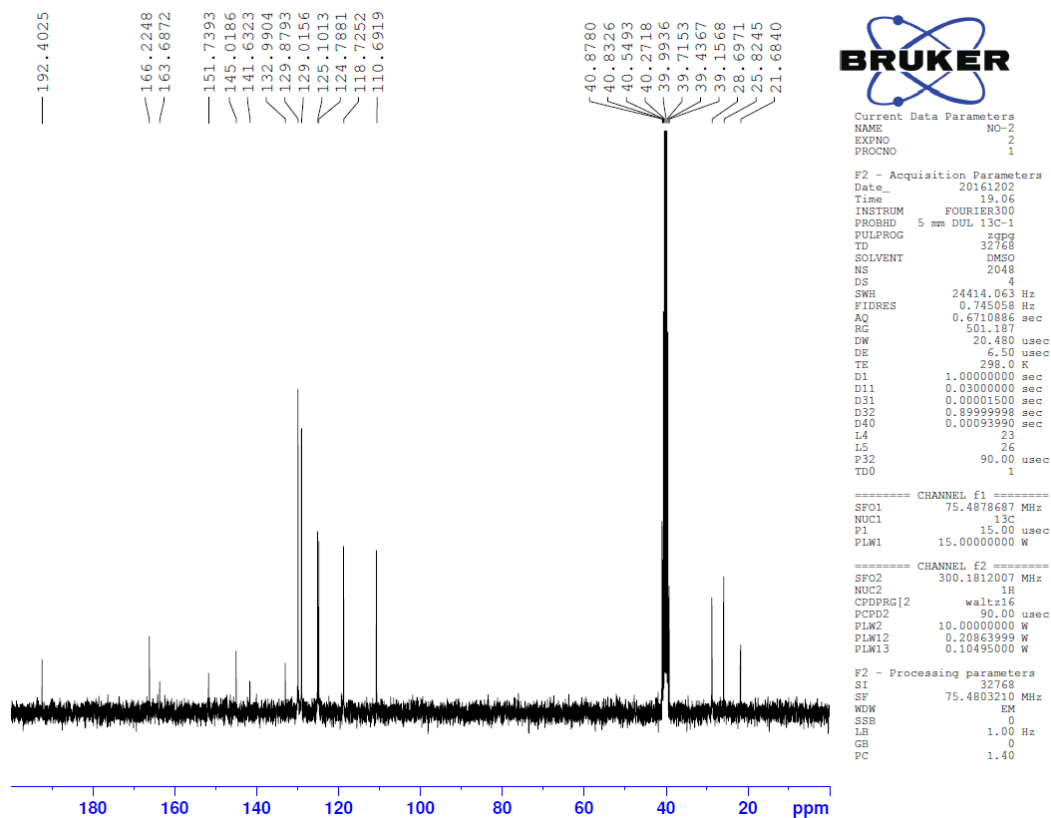

**Figure 21.** Compound 5b  $^{13}\text{C}$  NMR spectrum

Data File: C:\LabSolutions\Data\Analiz\denya\NO-3\_48.lod

| Elmt | Val. | Min | Max | Use Adduct |   |
|------|------|-----|-----|------|------|-----|-----|------|------|-----|-----|------|------|-----|-----|------------|---|
| H    | 1    | 9   | 20  | O    | 2    | 1   | 6   | Cl   | 1    | 0   | 2   |      | 1    | 3   | 0   | 0          | H |
| C    | 4    | 18  | 25  | F    | 1    | 0   | 1   | Br   | 1    | 0   | 1   |      |      |     |     |            |   |
| N    | 3    | 3   | 6   | S    | 2    | 2   | 2   | Ru   | 2    | 0   | 0   |      |      |     |     |            |   |

Error Margin (ppm): 10  
 HC Ratio: unlimited  
 Max Isotopes: 3  
 MSn Iso RI (%): 10.00

DBE Range: 12.0 - 15.0  
 Apply N Rule: yes  
 Isotope RI (%): 1.00  
 MSn Logic Mode: AND

Electron Ions: both  
 Use MSn Info: no  
 Isotope Res: 10000  
 Max Results: 500

Event#: 1 MS(E+) Ret. Time : 7.227 Scan#: 1085

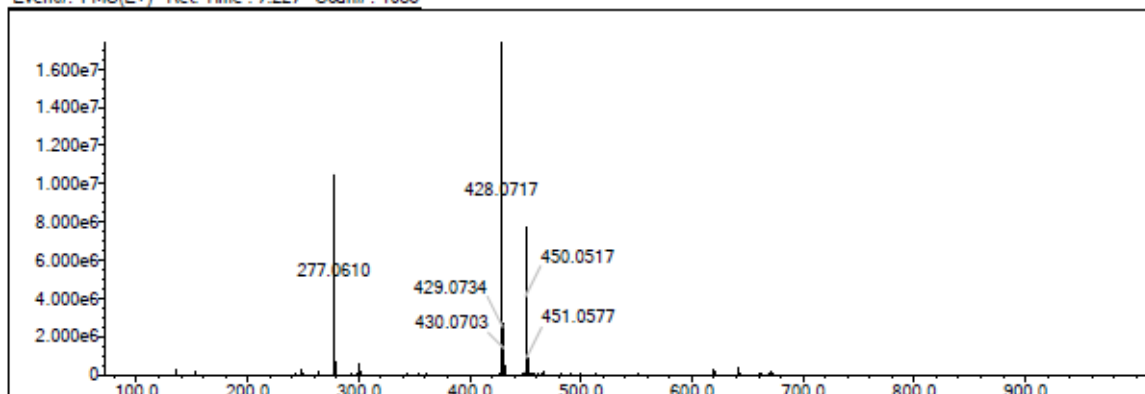

Measured region for 428.0717 m/z

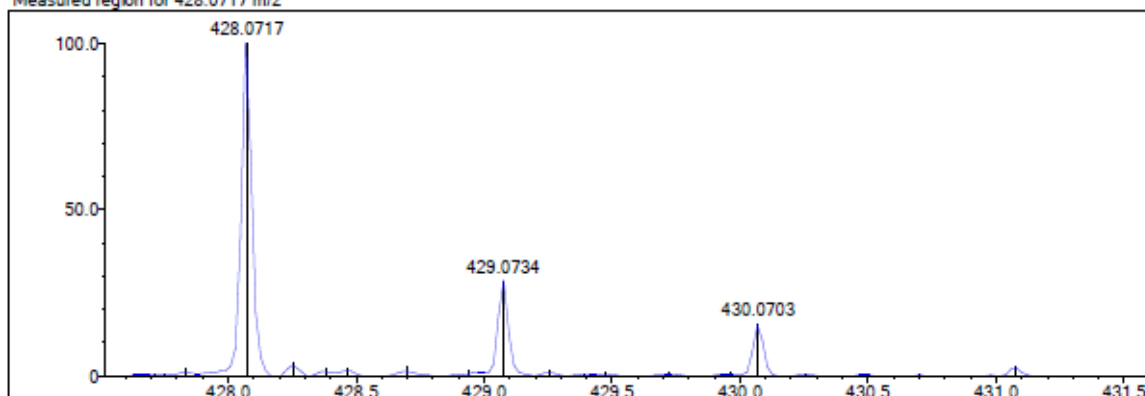

C20 H17 N3 O4 S2 [M+H]<sup>+</sup> : Predicted region for 428.0733 m/z

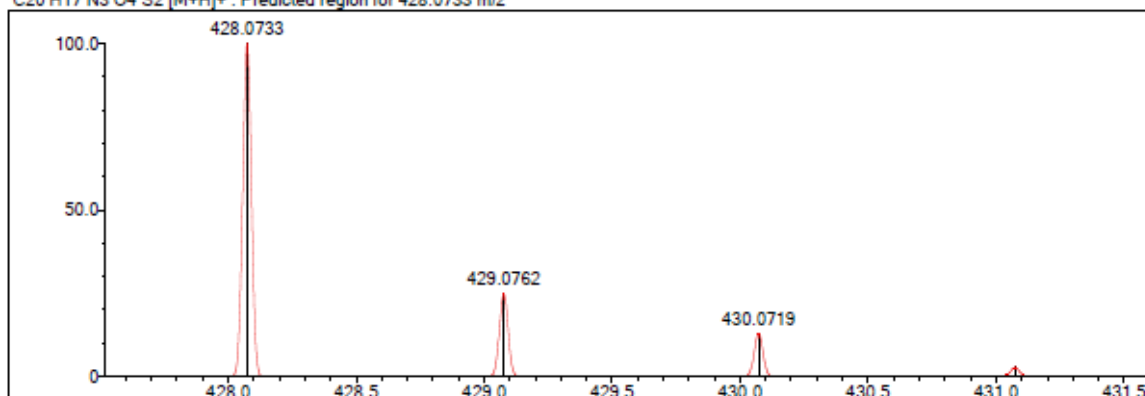

| Rank | Score | Formula (M)      | Ion                | Meas. m/z | Pred. m/z | Df. (mDa) | Df. (ppm) | Iso   | DBE  |
|------|-------|------------------|--------------------|-----------|-----------|-----------|-----------|-------|------|
| 1    | 74.27 | C20 H17 N3 O4 S2 | [M+H] <sup>+</sup> | 428.0717  | 428.0733  | -1.6      | -3.74     | 79.73 | 14.0 |

Figure 22. Compound 5c Mass spectrum



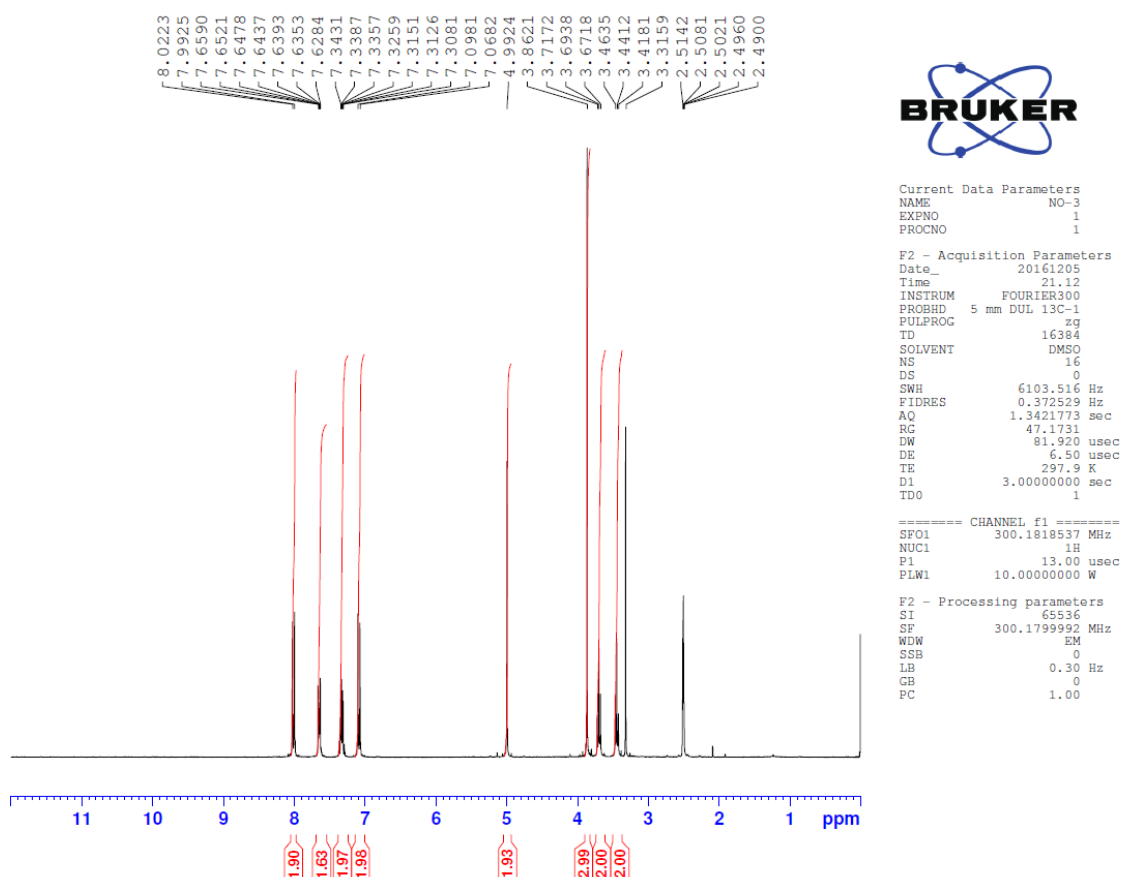

**Figure 23.** Compound 5c  $^1\text{H}$  NMR spectrum

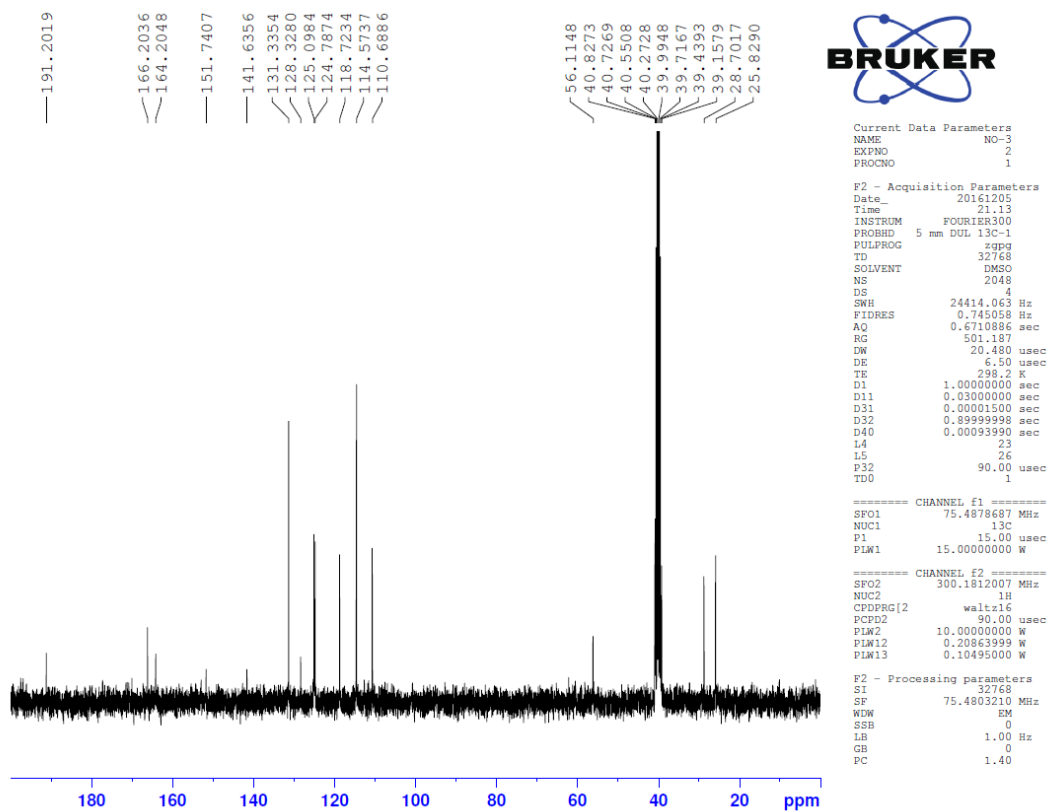

**Figure 24.** Compound 5c  $^{13}\text{C}$  NMR spectrum

Data File: C:\LabSolutions\Data\Analiz\denya\NO-4\_49 lod

| Elmt | Val. | Min | Max | Use Adduct |
|------|------|-----|-----|------|------|-----|-----|------|------|-----|-----|------|------|-----|-----|------------|
| H    | 1    | 9   | 20  | O    | 2    | 1   | 6   | Cl   | 1    | 0   | 2   | I    | 3    | 0   | 0   | H          |
| C    | 4    | 18  | 25  | F    | 1    | 0   | 1   | Br   | 1    | 0   | 1   |      |      |     |     |            |
| N    | 3    | 3   | 6   | S    | 2    | 2   | 2   | Ru   | 2    | 0   | 0   |      |      |     |     |            |

Error Margin (ppm): 10  
 HC Ratio: unlimited  
 Max Isotopes: 3  
 MSn Iso RI (%): 10.00

DBE Range: 12.0 - 15.0  
 Apply N Rule: yes  
 Isotope RI (%): 1.00  
 MSn Logic Mode: AND

Electron Ions: both  
 Use MSn Info: no  
 Isotope Res: 10000  
 Max Results: 500

Event#: 1 MS(E+) Ret. Time : 7.320 -> 7.693 Scan#: 1099 -> 1155

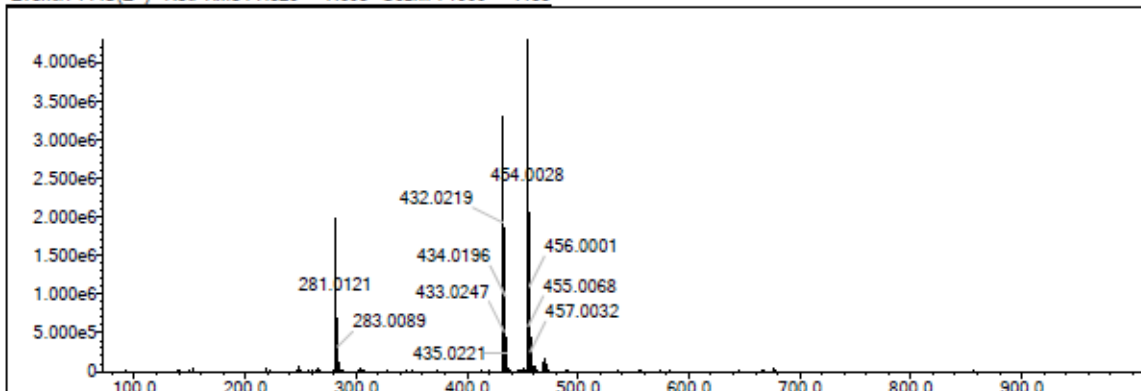

Measured region for 432.0219 m/z

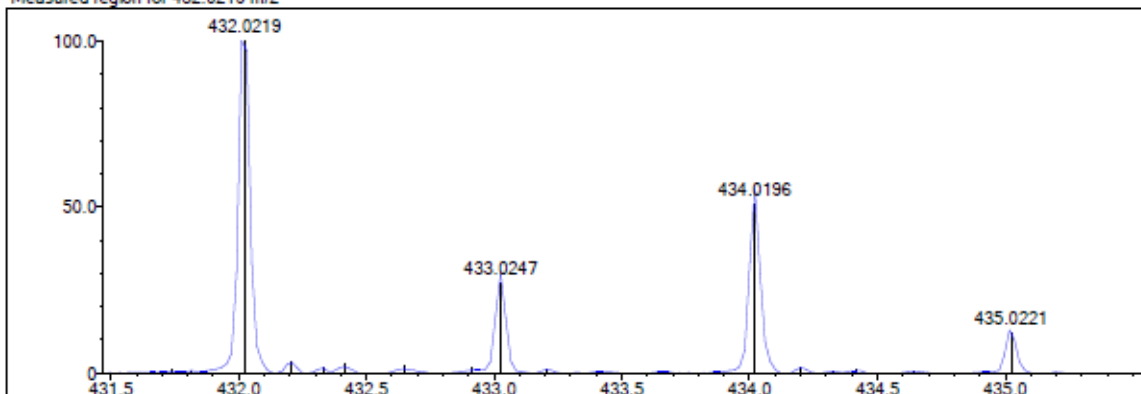

C19 H14 N3 O3 S2 Cl [M+H]<sup>+</sup> : Predicted region for 432.0238 m/z

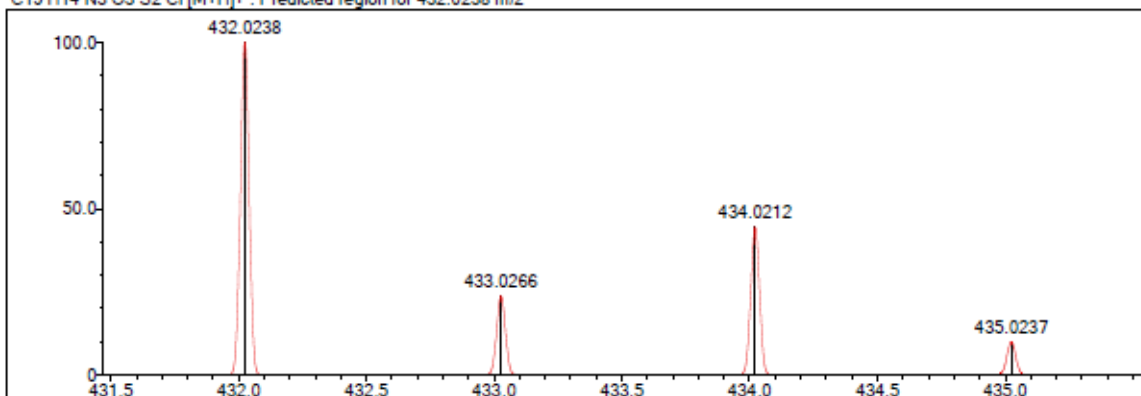

| Rank | Score | Formula (M)         | Ion                | Meas. m/z | Pred. m/z | Df. (mDa) | Df. (ppm) | Iso   | DBE  |
|------|-------|---------------------|--------------------|-----------|-----------|-----------|-----------|-------|------|
| 1    | 70.20 | C19 H14 N3 O3 S2 Cl | [M+H] <sup>+</sup> | 432.0219  | 432.0238  | -1.9      | -4.40     | 76.73 | 14.0 |

Figure 25. Compound 5d Mass spectrum

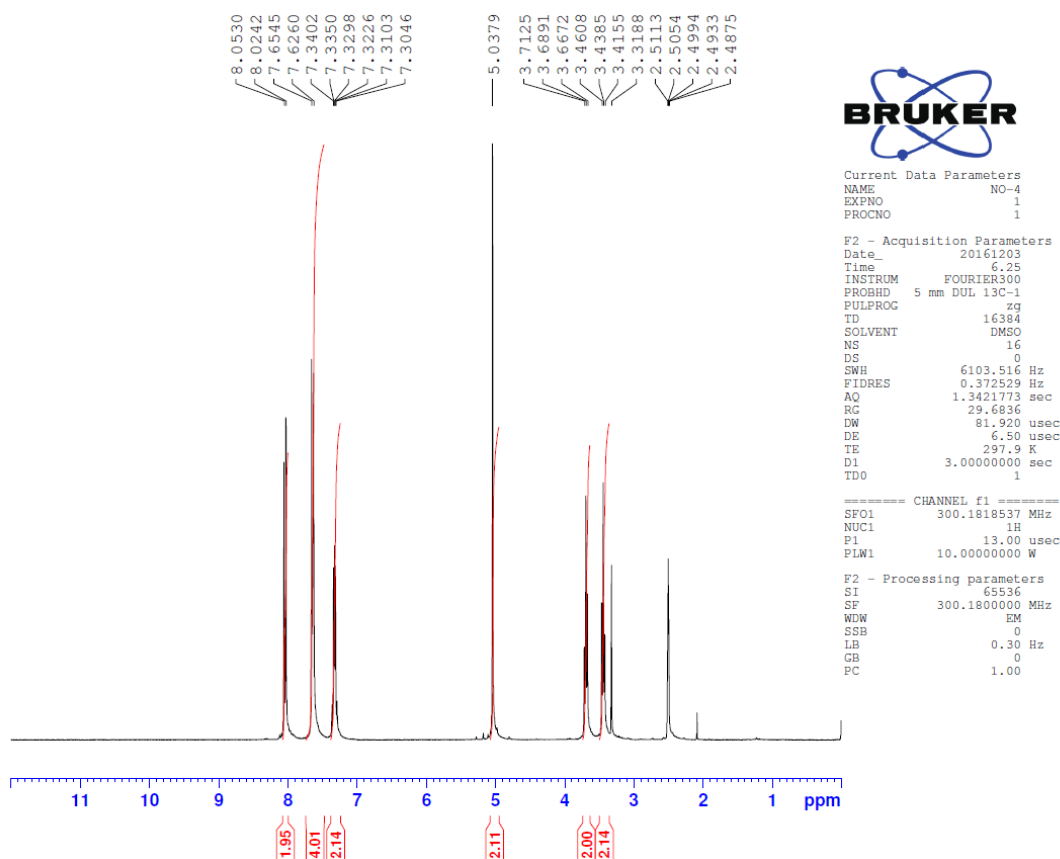

**Figure 26.** Compound 5d  $^1\text{H}$  NMR spectrum

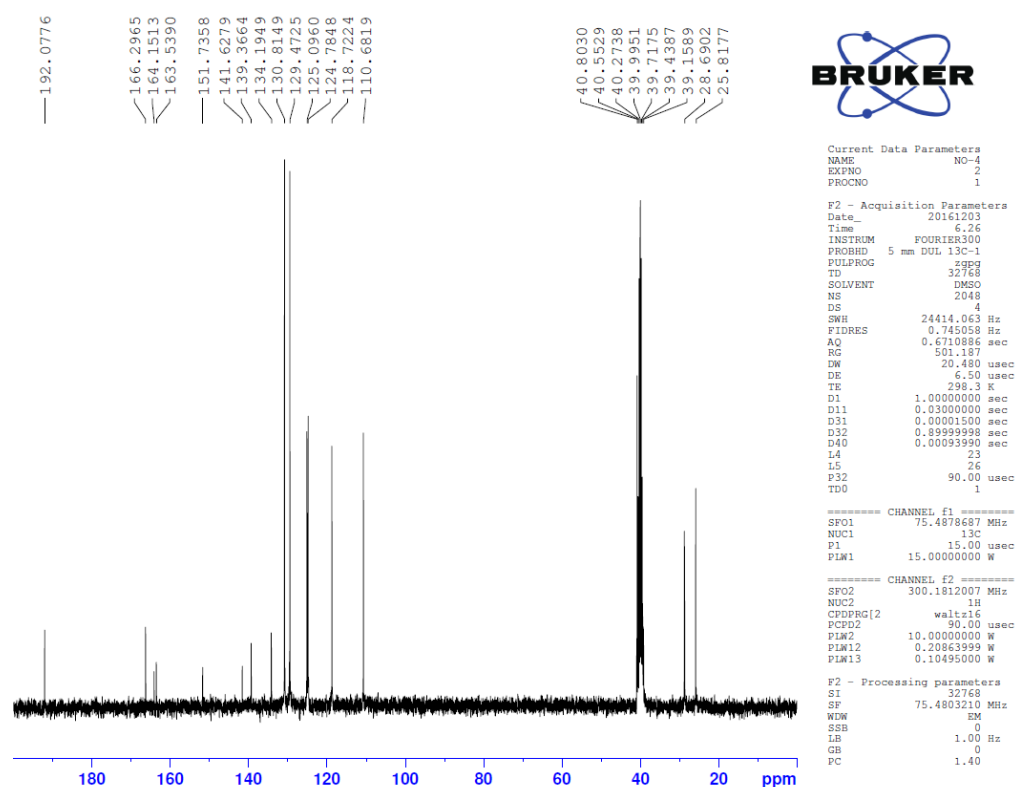

**Figure 27.** Compound 5d  $^{13}\text{C}$  NMR spectrum

Data File: C:\LabSolutions\Data\Analiz\derya\NO-5\_50.lod

| Elmt | Val. | Min | Max | Use Adduct |
|------|------|-----|-----|------|------|-----|-----|------|------|-----|-----|------|------|-----|-----|------------|
| H    | 1    | 9   | 20  | O    | 2    | 1   | 6   | Cl   | 1    | 0   | 2   | I    | 3    | 0   | 0   | H          |
| C    | 4    | 18  | 25  | F    | 1    | 0   | 1   | Br   | 1    | 0   | 1   |      |      |     |     |            |
| N    | 3    | 3   | 6   | S    | 2    | 2   | 2   | Ru   | 2    | 0   | 0   |      |      |     |     |            |

Error Margin (ppm): 10

HC Ratio: unlimited

Max Isotopes: 3

MSn Iso RI (%): 10.00

DBE Range: 12.0 - 15.0

Apply N Rule: yes

Isotope RI (%): 1.00

MSn Logic Mode: AND

Electron Ions: both

Use MSn Info: no

Isotope Res: 10000

Max Results: 500

Event#: 1 MS(E+) Ret. Time : 7.160 Scan#: 1075

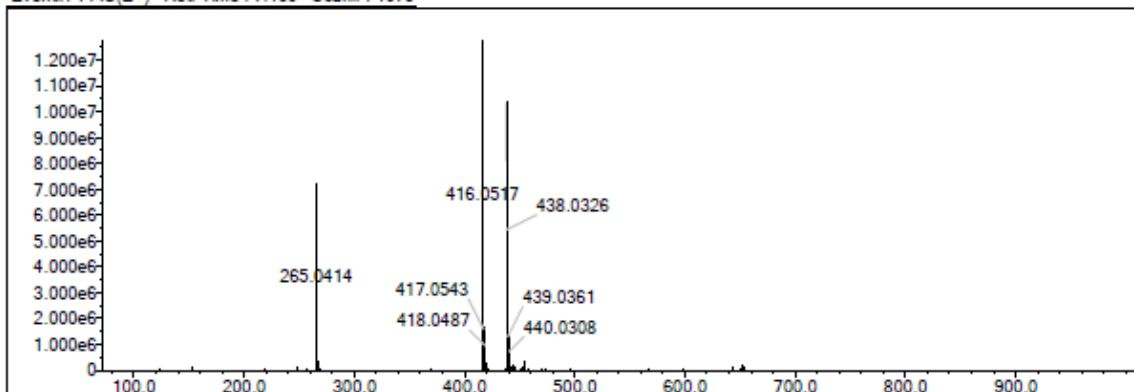

Measured region for 416.0517 m/z

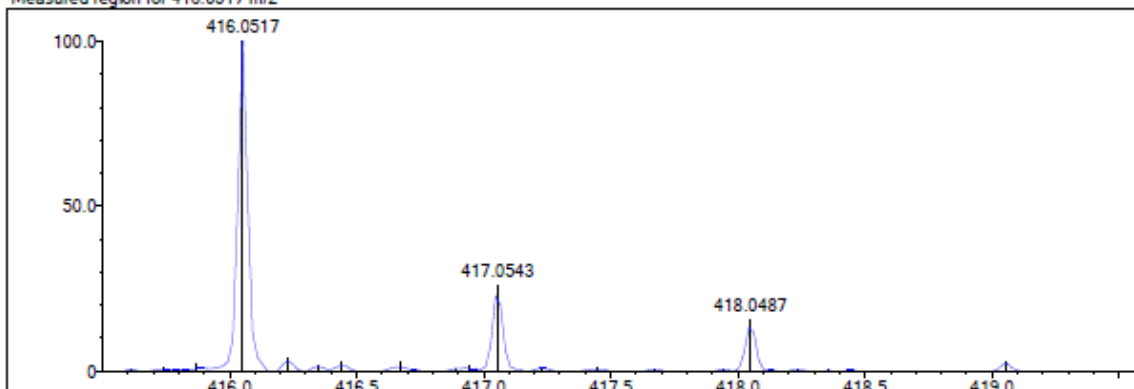

C19 H14 N3 O3 F S2 [M+H]<sup>+</sup> : Predicted region for 416.0533 m/z

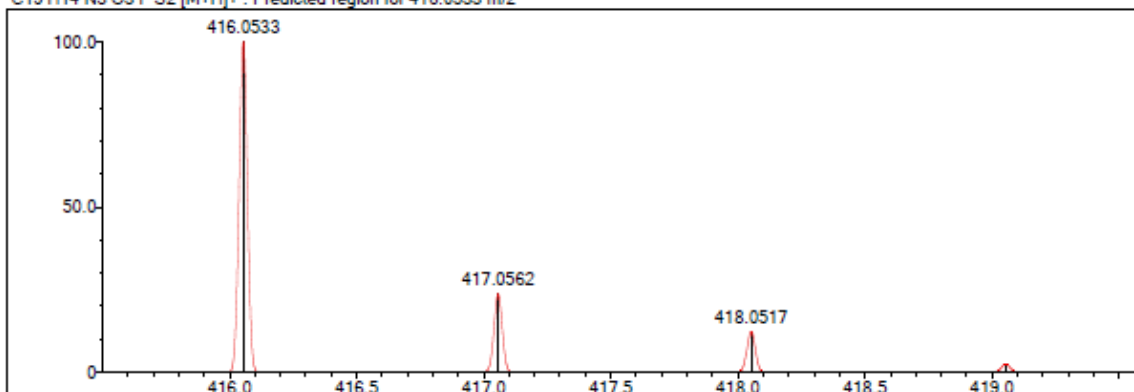

| Rank | Score | Formula (M)        | Ion                | Meas. m/z | Pred. m/z | Df. (mDa) | Df. (ppm) | Iso   | DBE  |
|------|-------|--------------------|--------------------|-----------|-----------|-----------|-----------|-------|------|
| 1    | 88.45 | C19 H14 N3 O3 F S2 | [M+H] <sup>+</sup> | 416.0517  | 416.0533  | -1.6      | -3.85     | 95.23 | 14.0 |

Figure 28. Compound 5e Mass spectrum

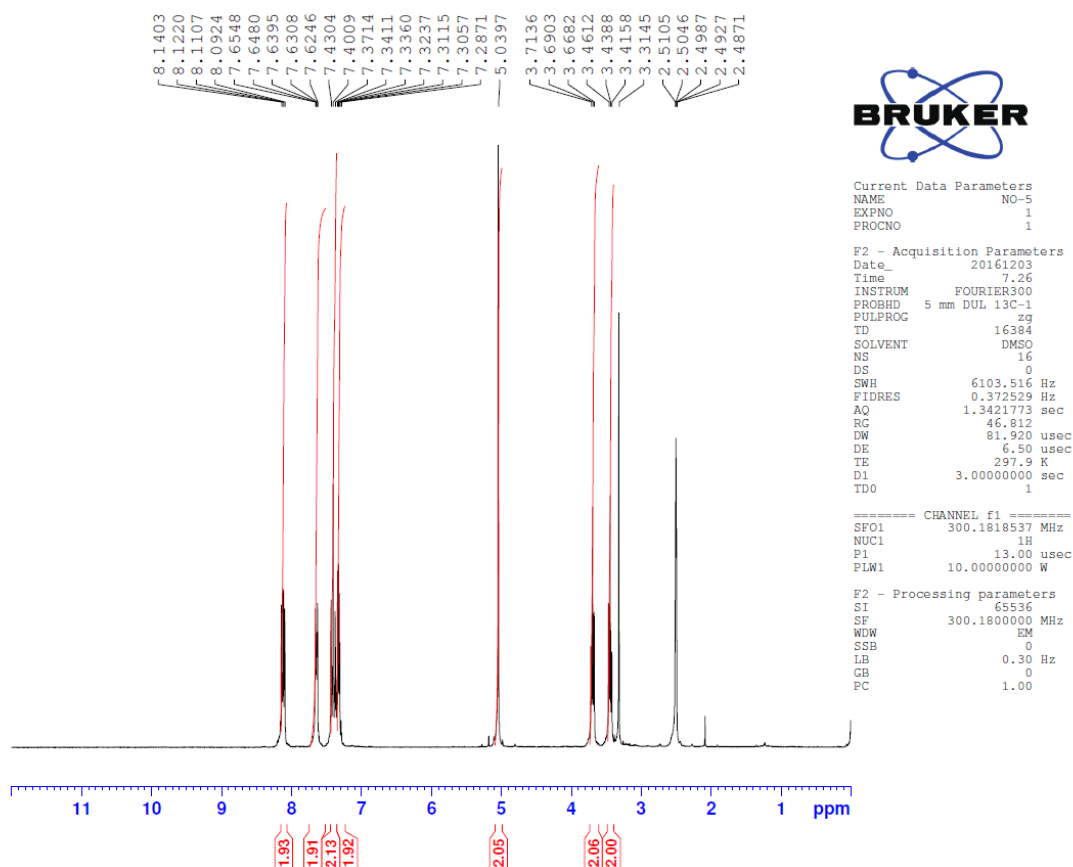

Figure 29. Compound 5e  $^1\text{H}$  NMR spectrum

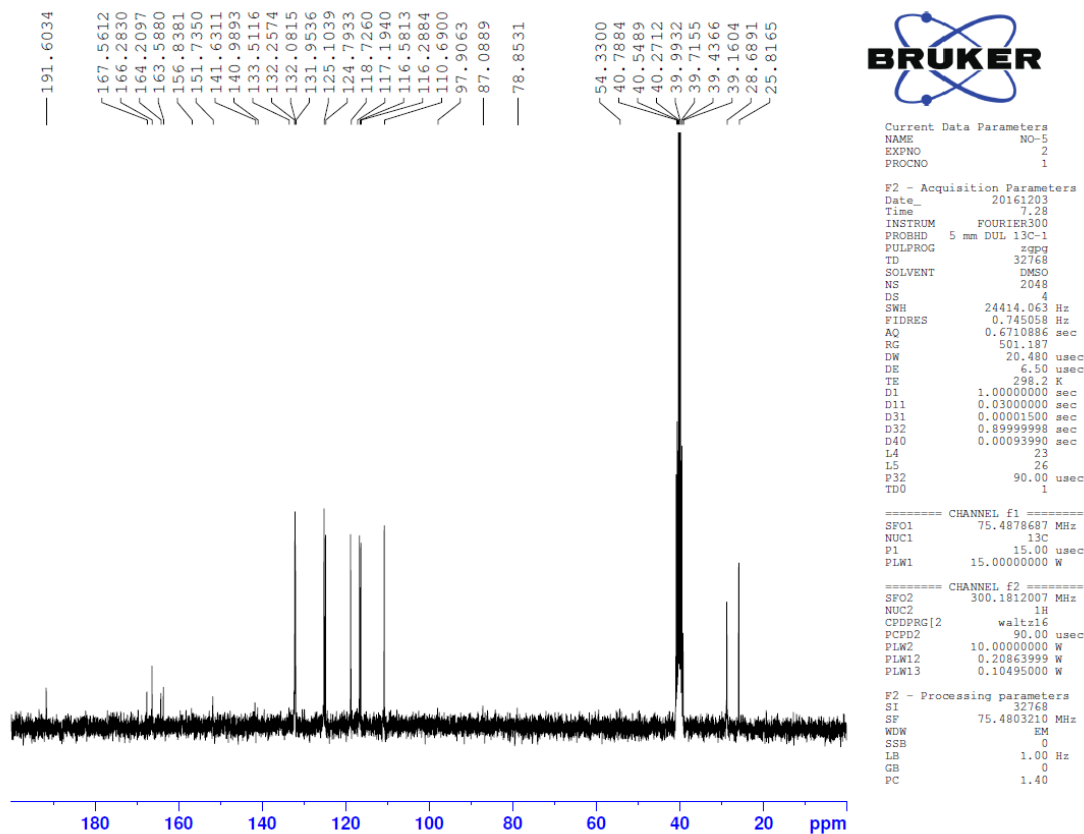

Figure 30. Compound 5e  $^{13}\text{C}$  NMR spectrum

Data File: C:\LabSolutions\Data\Analiz\denya\NO-6\_51.lod

| Elmt | Val. | Min | Max | Use Adduct |
|------|------|-----|-----|------|------|-----|-----|------|------|-----|-----|------|------|-----|-----|------------|
| H    | 1    | 9   | 20  | O    | 2    | 1   | 6   | Cl   | 1    | 0   | 2   | I    | 3    | 0   | 0   | H          |
| C    | 4    | 18  | 25  | F    | 1    | 0   | 1   | Br   | 1    | 0   | 1   |      |      |     |     |            |
| N    | 3    | 3   | 6   | S    | 2    | 2   | 2   | Ru   | 2    | 0   | 0   |      |      |     |     |            |

Error Margin (ppm): 10

HC Ratio: unlimited

Max Isotopes: 3

MSn Iso RI (%): 10.00

DBE Range: 12.0 - 15.0

Apply N Rule: yes

Isotope RI (%): 1.00

MSn Logic Mode: AND

Electron Ions: both

Use MSn Info: no

Isotope Res: 10000

Max Results: 500

Event#: 1 MS(E+) Ret. Time : 7.173 Scan#: 1077

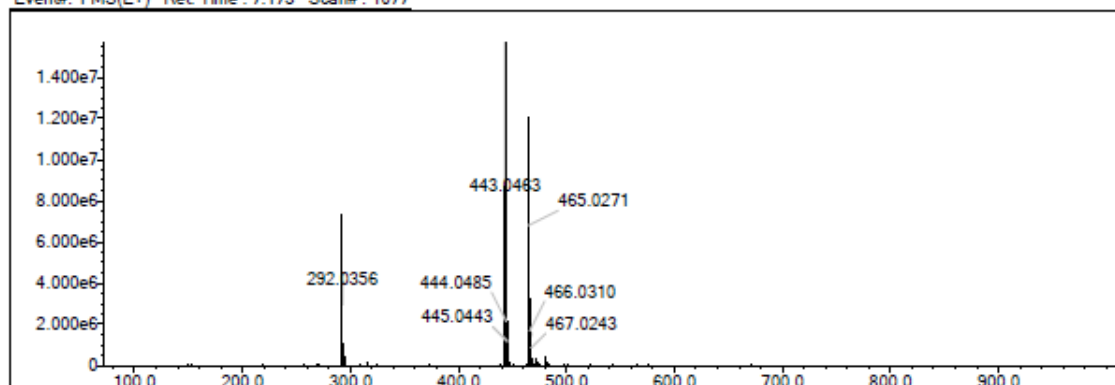

Measured region for 443.0463 m/z

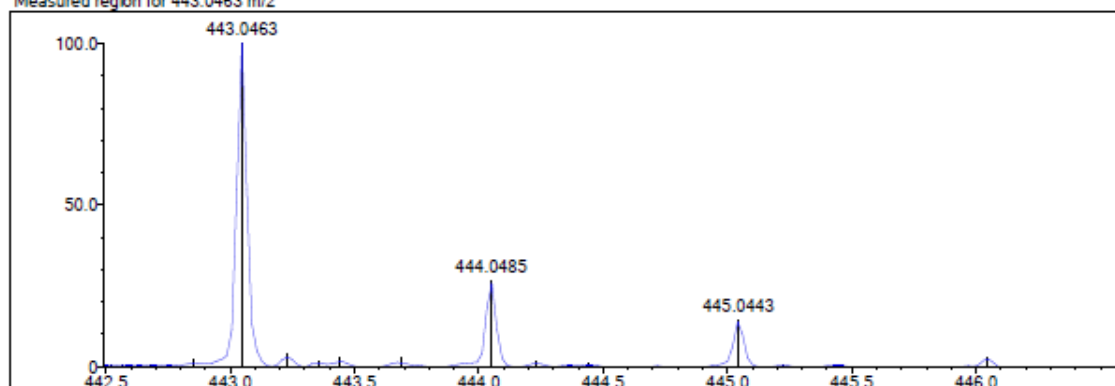

C19 H14 N4 O5 S2 [M+H]<sup>+</sup> : Predicted region for 443.0478 m/z

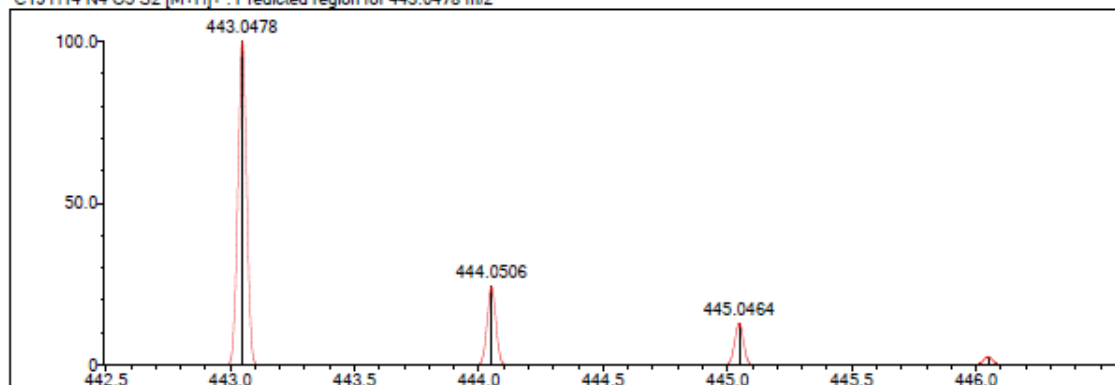

| Rank | Score | Formula (M)      | Ion                | Meas. m/z | Pred. m/z | Df. (mDa) | Df. (ppm) | Iso   | DBE  |
|------|-------|------------------|--------------------|-----------|-----------|-----------|-----------|-------|------|
| 1    | 93.14 | C19 H14 N4 O5 S2 | [M+H] <sup>+</sup> | 443.0463  | 443.0478  | -1.5      | -3.39     | 99.06 | 15.0 |

**Figure 31.** Compound 5f Mass spectrum

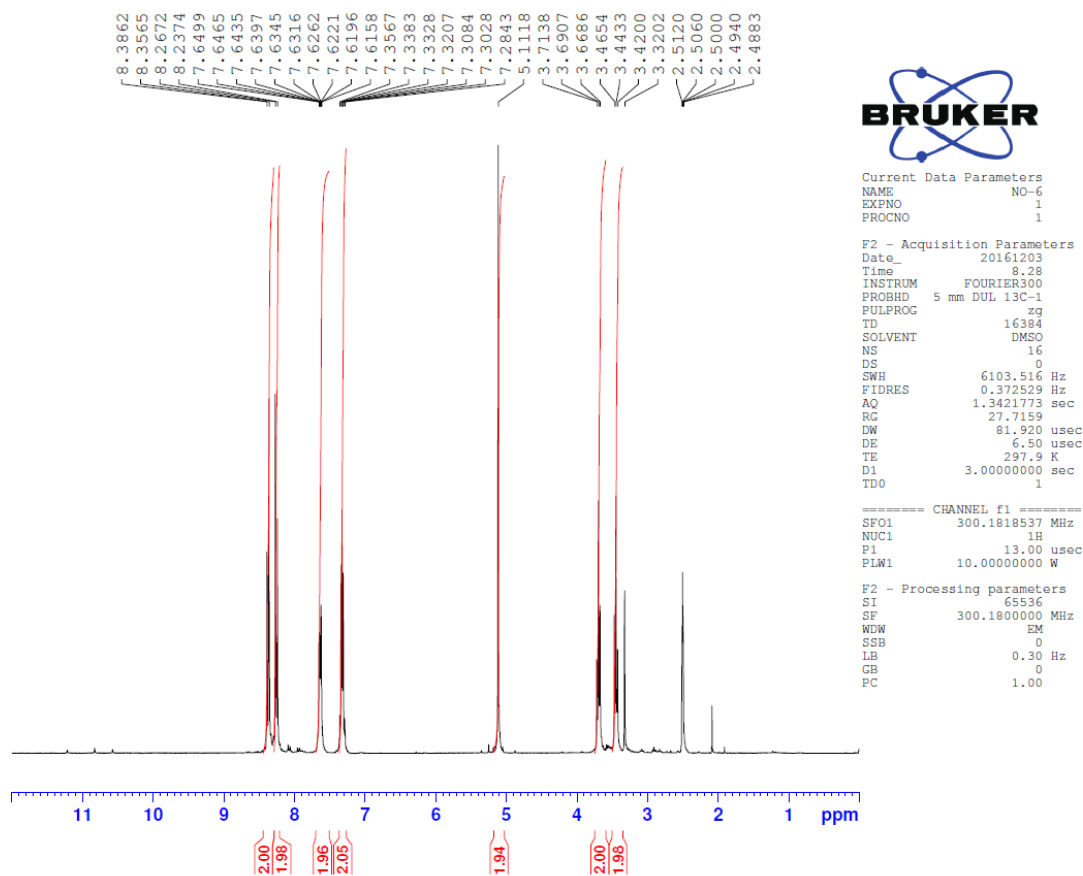

Figure 32. Compound 5f  $^1\text{H}$  NMR spectrum

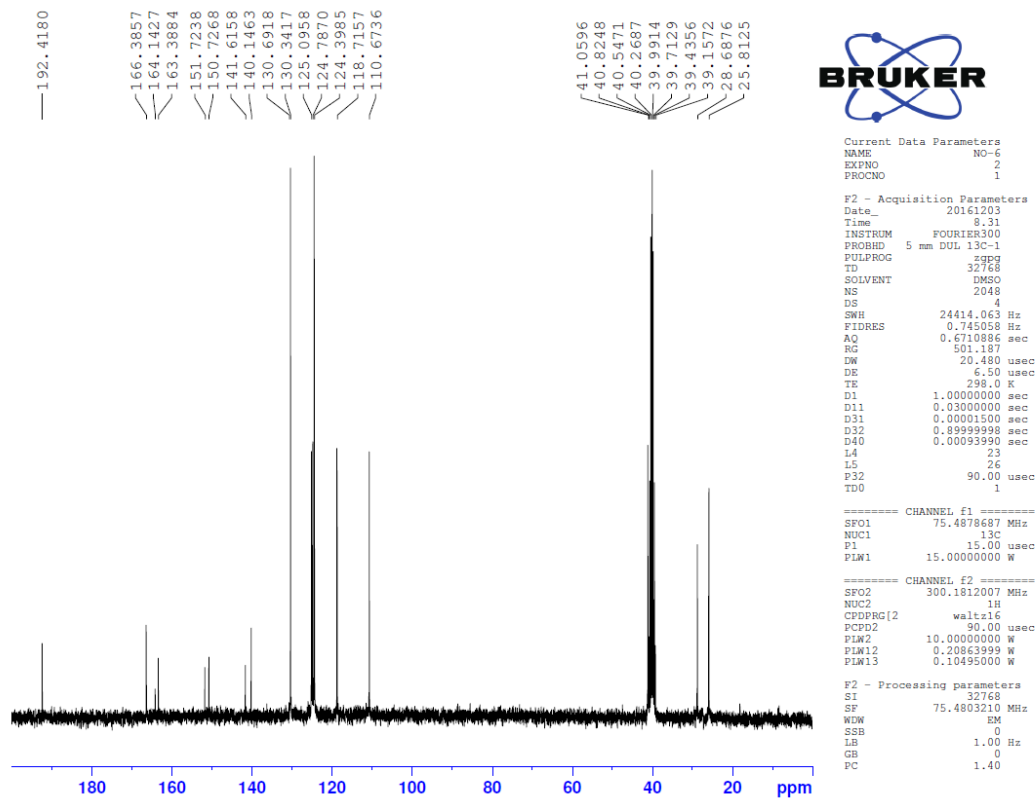

Figure 33. Compound 5f  $^{13}\text{C}$  NMR spectrum
